# Supplementary material for: Evaluation of the molecular inclusion process of β-hexachlorocyclohexane in cyclodextrins
Source: Royal Society of Chemistry journal article supplement (doi:10.1039/c9ra04431k), 2019-01-01
Supplement: c9ra04431k1.pdf [file c9ra04431k1.pdf]

# Evaluation of the Molecular Inclusion Process of $\beta$ -Hexachlorocyclohexane at Cyclodextrins.

*Anthuan Ferino-Pérez<sup>1</sup>, Juan José Gamboa-Carballo<sup>1,2</sup>, Ronald Ranguin<sup>3</sup>, Joëlle Levalois-Grützmacher<sup>2,4</sup>, Sarra Gaspard<sup>3</sup>, Ramón Alain Miranda-Quintana<sup>5</sup>, Melvin Arias<sup>6</sup>, Ulises J. Jáuregui-Haza<sup>1,6\*</sup>*

<sup>1</sup>Instituto Superior de Tecnologías y Ciencias Aplicadas (InSTEC), Universidad de La Habana, La Habana, CP 10600, Cuba

<sup>2</sup>Department of Chemistry and Applied Biosciences, Laboratory of Inorganic Chemistry, ETH Zürich, CH-8093, Switzerland

<sup>3</sup>Laboratoire COVACHIM M2E, Université des Antilles, Pointe à Pitre, 97157, Guadeloupe, France

<sup>4</sup>Department of Chemistry, Université des Antilles, Pointe à Pitre, 97157, Guadeloupe, France

<sup>5</sup>Department of Chemistry, York University, Toronto, Ontario, Canada

<sup>6</sup>Instituto Tecnológico de Santo Domingo, Área de Ciencias Básicas y Ambientales, Ave. de los Próceres, Santo Domingo, República Dominicana

\* **Corresponding author:** [ulises.jauregui@intec.edu.do](mailto:ulises.jauregui@intec.edu.do), [ulises@instec.cu](mailto:ulises@instec.cu)

## Supporting Information

**Table S1.** Characteristic dimensions of the studied cyclodextrins <sup>1</sup> and of the  $\beta$ -HCH.

| cyclodextrins                      |            | $\alpha$ -CD | $\beta$ -CD                         | $\gamma$ -CD |                           |
|------------------------------------|------------|--------------|-------------------------------------|--------------|---------------------------|
| internal cavity diameter (nm)      |            | 0.47-0.53    | 0.60-0.65                           | 0.75-0.83    |                           |
| external cavity diameter (nm)      |            | 1.46         | 1.54                                | 1.75         |                           |
| cavity's height (nm)               |            | 0.79         | 0.79                                | 0.79         |                           |
| cavity's volume (nm <sup>3</sup> ) |            | 0.174        | 0.262                               | 0.427        |                           |
| $\beta$ -HCH                       | large (nm) | width (nm)   | superficial area (nm <sup>2</sup> ) | height (nm)  | volume (nm <sup>3</sup> ) |
|                                    | 0.63       | 0.53         | 0.0278                              | 0.22         | 0.0625                    |

**Table S2.** Multiple Minimums Hypersurfaces (MMH) methodology results.

| conformers | CDs          | energy (eV) | $E_{\text{CD+HCH}}$ (eV) | $\Delta E_{\text{ASSOC}}$ (kJ/mol) | $\Delta S_{\text{ASSOC}}$ (kJ/mol) | $\Delta A_{\text{ASSOC}}$ (kJ/mol) |
|------------|--------------|-------------|--------------------------|------------------------------------|------------------------------------|------------------------------------|
| A1         | $\alpha$ -CD | -13974.7    | -16319.3                 | -48.24                             | 15.67                              | -52.91                             |
|            | $\beta$ -CD  | -16303.7    | -18648.3                 | -49.40                             | 17.49                              | -54.61                             |
|            | $\gamma$ -CD | -18632.6    | -20977.2                 | -75.20                             | 4.98                               | -76.69                             |
| A2         | $\alpha$ -CD | -13975.0    | -16319.6                 | -50.42                             | 14.36                              | -54.70                             |
|            | $\beta$ -CD  | -16304.0    | -18648.7                 | -49.40                             | 20.50                              | -55.51                             |
|            | $\gamma$ -CD | -18632.9    | -20977.6                 | -61.24                             | 12.22                              | -64.89                             |
| A3         | $\alpha$ -CD | -13974.6    | -16319.2                 | -50.12                             | 17.92                              | -55.47                             |
|            | $\beta$ -CD  | -16303.5    | -18648.2                 | -58.54                             | 8.21                               | -60.99                             |
|            | $\gamma$ -CD | -18632.4    | -20977.0                 | -66.09                             | 11.61                              | -69.55                             |
| A4         | $\alpha$ -CD | -13975.1    | -16319.8                 | -48.93                             | 11.33                              | -52.31                             |
|            | $\beta$ -CD  | -16304.2    | -18648.9                 | -47.12                             | 19.10                              | -52.82                             |
|            | $\gamma$ -CD | -18633.2    | -20977.8                 | -61.30                             | 8.88                               | -63.95                             |
| B2         | $\alpha$ -CD | -13974.1    | -16318.7                 | -75.27                             | 5.13                               | -76.80                             |
|            | $\beta$ -CD  | -16302.9    | -18647.5                 | -82.51                             | 7.62                               | -84.79                             |
|            | $\gamma$ -CD | -18631.6    | -20976.3                 | -118.64                            | 0.02                               | -118.65                            |
| B3         | $\alpha$ -CD | -13973.7    | -16318.3                 | -77.91                             | 3.31                               | -78.89                             |
|            | $\beta$ -CD  | -16302.4    | -18647.1                 | -87.93                             | 11.35                              | -91.32                             |
|            | $\gamma$ -CD | -18631.1    | -20975.7                 | -106.05                            | 17.21                              | -111.18                            |
| C1         | $\alpha$ -CD | -13973.9    | -16318.5                 | -49.78                             | 13.31                              | -53.75                             |
|            | $\beta$ -CD  | -16302.8    | -18647.4                 | -68.26                             | 17.57                              | -73.50                             |
|            | $\gamma$ -CD | -18631.5    | -20976.1                 | -87.48                             | 9.48                               | -90.30                             |
| C4         | $\alpha$ -CD | -13974.4    | -16319.0                 | -48.93                             | 11.33                              | -52.31                             |
|            | $\beta$ -CD  | -16303.3    | -18647.9                 | -75.35                             | 9.01                               | -78.04                             |
|            | $\gamma$ -CD | -18632.1    | -20976.8                 | -92.24                             | 3.20                               | -93.19                             |

**Table S3.** Energies of the conformers B2, B3, C1 and C4 of the cyclodextrins obtained via DFT M06-2X/SMD and of the  $\beta$ -HCH.

| <b>conformers</b>             | <b>CDs</b>                    | <b>E M06-2X/SMD water (kJ/mol)</b> |
|-------------------------------|-------------------------------|------------------------------------|
| <b>B2</b>                     | <b><math>\alpha</math>-CD</b> | -9618303                           |
|                               | <b><math>\beta</math>-CD</b>  | -11221380                          |
|                               | <b><math>\gamma</math>-CD</b> | -12824441                          |
| <b>B3</b>                     | <b><math>\alpha</math>-CD</b> | -9618292                           |
|                               | <b><math>\beta</math>-CD</b>  | -11221369                          |
|                               | <b><math>\gamma</math>-CD</b> | -12824429                          |
| <b>C1</b>                     | <b><math>\alpha</math>-CD</b> | -9618292                           |
|                               | <b><math>\beta</math>-CD</b>  | -11221353                          |
|                               | <b><math>\gamma</math>-CD</b> | -12824400                          |
| <b>C4</b>                     | <b><math>\alpha</math>-CD</b> | -9618305                           |
|                               | <b><math>\beta</math>-CD</b>  | -11221368                          |
|                               | <b><math>\gamma</math>-CD</b> | -12824416                          |
| <b><math>\beta</math>-HCH</b> |                               | -7858595                           |

**Table S4.** Energies at vacuum of studied complexes and reactants (conformers B2, B3, C1 and C4 of the cyclodextrins and the  $\beta$ -HCH) obtained via DFT M06-2X. The latter were calculated using the basis set of the supermolecule.

| <b>complexes</b>                                          | <b><math>E_{\text{complex}}</math> (kJ/mol)</b> | <b><math>E_{\text{CD}}</math> (kJ/mol)</b> | <b><math>E_{\beta\text{-HCH}}</math> (kJ/mol)</b> |
|-----------------------------------------------------------|-------------------------------------------------|--------------------------------------------|---------------------------------------------------|
| <b><math>\beta</math>-HCH@B2-<math>\alpha</math>-CD</b>   | -17476627.0                                     | -7858557.6                                 | -9617973.3                                        |
| <b><math>\beta</math>-HCH@B2-<math>\beta</math>-CD</b>    | -19079668.4                                     | -7858557.2                                 | -11220980.2                                       |
| <b><math>\beta</math>-HCH@B2-<math>\gamma</math>-CD</b>   | -20682646.8                                     | -7858559.3                                 | -12823960.3                                       |
| <b><math>\beta</math>-HCH@B3-<math>\alpha</math>-CD</b>   | -17476637.1                                     | -7858556.0                                 | -9617969.1                                        |
| <b><math>\beta</math>-HCH@B3-<math>\beta</math>-CD</b>    | -19079681.5                                     | -7858555.8                                 | -11221002.0                                       |
| <b><math>\beta</math>-HCH@B3-<math>\gamma</math>-CD</b>   | -20682588.8                                     | -7858558.9                                 | -12824001.4                                       |
| <b><math>\beta</math>-HCH@C1-<math>\alpha</math>-CD</b>   | -17476659.1                                     | -7858556.3                                 | -9618012.6                                        |
| <b><math>\beta</math>-HCH@C1-<math>\beta</math>-CD.1</b>  | -19079678.6                                     | -7858556.9                                 | -11221003.4                                       |
| <b><math>\beta</math>-HCH@C1-<math>\beta</math>-CD.2</b>  | -19079686.4                                     | -7858558.6                                 | -11220996.0                                       |
| <b><math>\beta</math>-HCH@C1-<math>\gamma</math>-CD.1</b> | -20682682.2                                     | -7858559.3                                 | -12823997.0                                       |
| <b><math>\beta</math>-HCH@C1-<math>\gamma</math>-CD.2</b> | -20682662.3                                     | -7858559.8                                 | -12823990.3                                       |
| <b><math>\beta</math>-HCH@C4-<math>\alpha</math>-CD</b>   | -17476621.9                                     | -7858557.4                                 | -9617984.3                                        |
| <b><math>\beta</math>-HCH@C4-<math>\beta</math>-CD.1</b>  | -19079624.5                                     | -7858554.7                                 | -11220989.1                                       |
| <b><math>\beta</math>-HCH@C4-<math>\beta</math>-CD.2</b>  | -19079635.8                                     | -7858559.9                                 | -11220968.9                                       |
| <b><math>\beta</math>-HCH@C4-<math>\gamma</math>-CD</b>   | -20682642.4                                     | -7858560.2                                 | -12823983.0                                       |

**Table S5.** Energies at vacuum of the reactants with the geometry presented on the final complexes.

| <b>complexes</b>                                          | <b><math>E_{CD}</math> (kJ/mol)</b> | <b><math>E_{\beta-HCH}</math> (kJ/mol)</b> |
|-----------------------------------------------------------|-------------------------------------|--------------------------------------------|
| <b><math>\beta</math>-HCH@B2-<math>\alpha</math>-CD</b>   | -9617956.0                          | -7858550.3                                 |
| <b><math>\beta</math>-HCH@B2-<math>\beta</math>-CD</b>    | -11220957.3                         | -7858548.2                                 |
| <b><math>\beta</math>-HCH@B2-<math>\gamma</math>-CD</b>   | -12823932.2                         | -7858549.5                                 |
| <b><math>\beta</math>-HCH@B3-<math>\alpha</math>-CD</b>   | -9617942.8                          | -7858547.9                                 |
| <b><math>\beta</math>-HCH@B3-<math>\beta</math>-CD</b>    | -11220977.6                         | -7858546.9                                 |
| <b><math>\beta</math>-HCH@B3-<math>\gamma</math>-CD</b>   | -12823978.8                         | -7858549.9                                 |
| <b><math>\beta</math>-HCH@C1-<math>\alpha</math>-CD</b>   | -9617980.4                          | -7858548.4                                 |
| <b><math>\beta</math>-HCH@C1-<math>\beta</math>-CD.1</b>  | -11220971.6                         | -7858548.2                                 |
| <b><math>\beta</math>-HCH@C1-<math>\beta</math>-CD.2</b>  | -11220963.3                         | -7858549.2                                 |
| <b><math>\beta</math>-HCH@C1-<math>\gamma</math>-CD.1</b> | -12823964.0                         | -7858550.3                                 |
| <b><math>\beta</math>-HCH@C1-<math>\gamma</math>-CD.2</b> | -12823971.5                         | -7858550.1                                 |
| <b><math>\beta</math>-HCH@C4-<math>\alpha</math>-CD</b>   | -9617970.2                          | -7858550.7                                 |
| <b><math>\beta</math>-HCH@C4-<math>\beta</math>-CD.1</b>  | -11220976.3                         | -7858549.0                                 |
| <b><math>\beta</math>-HCH@C4-<math>\beta</math>-CD.2</b>  | -11220939.1                         | -7858550.1                                 |
| <b><math>\beta</math>-HCH@C4-<math>\gamma</math>-CD</b>   | -12823956.9                         | -7858550.0                                 |

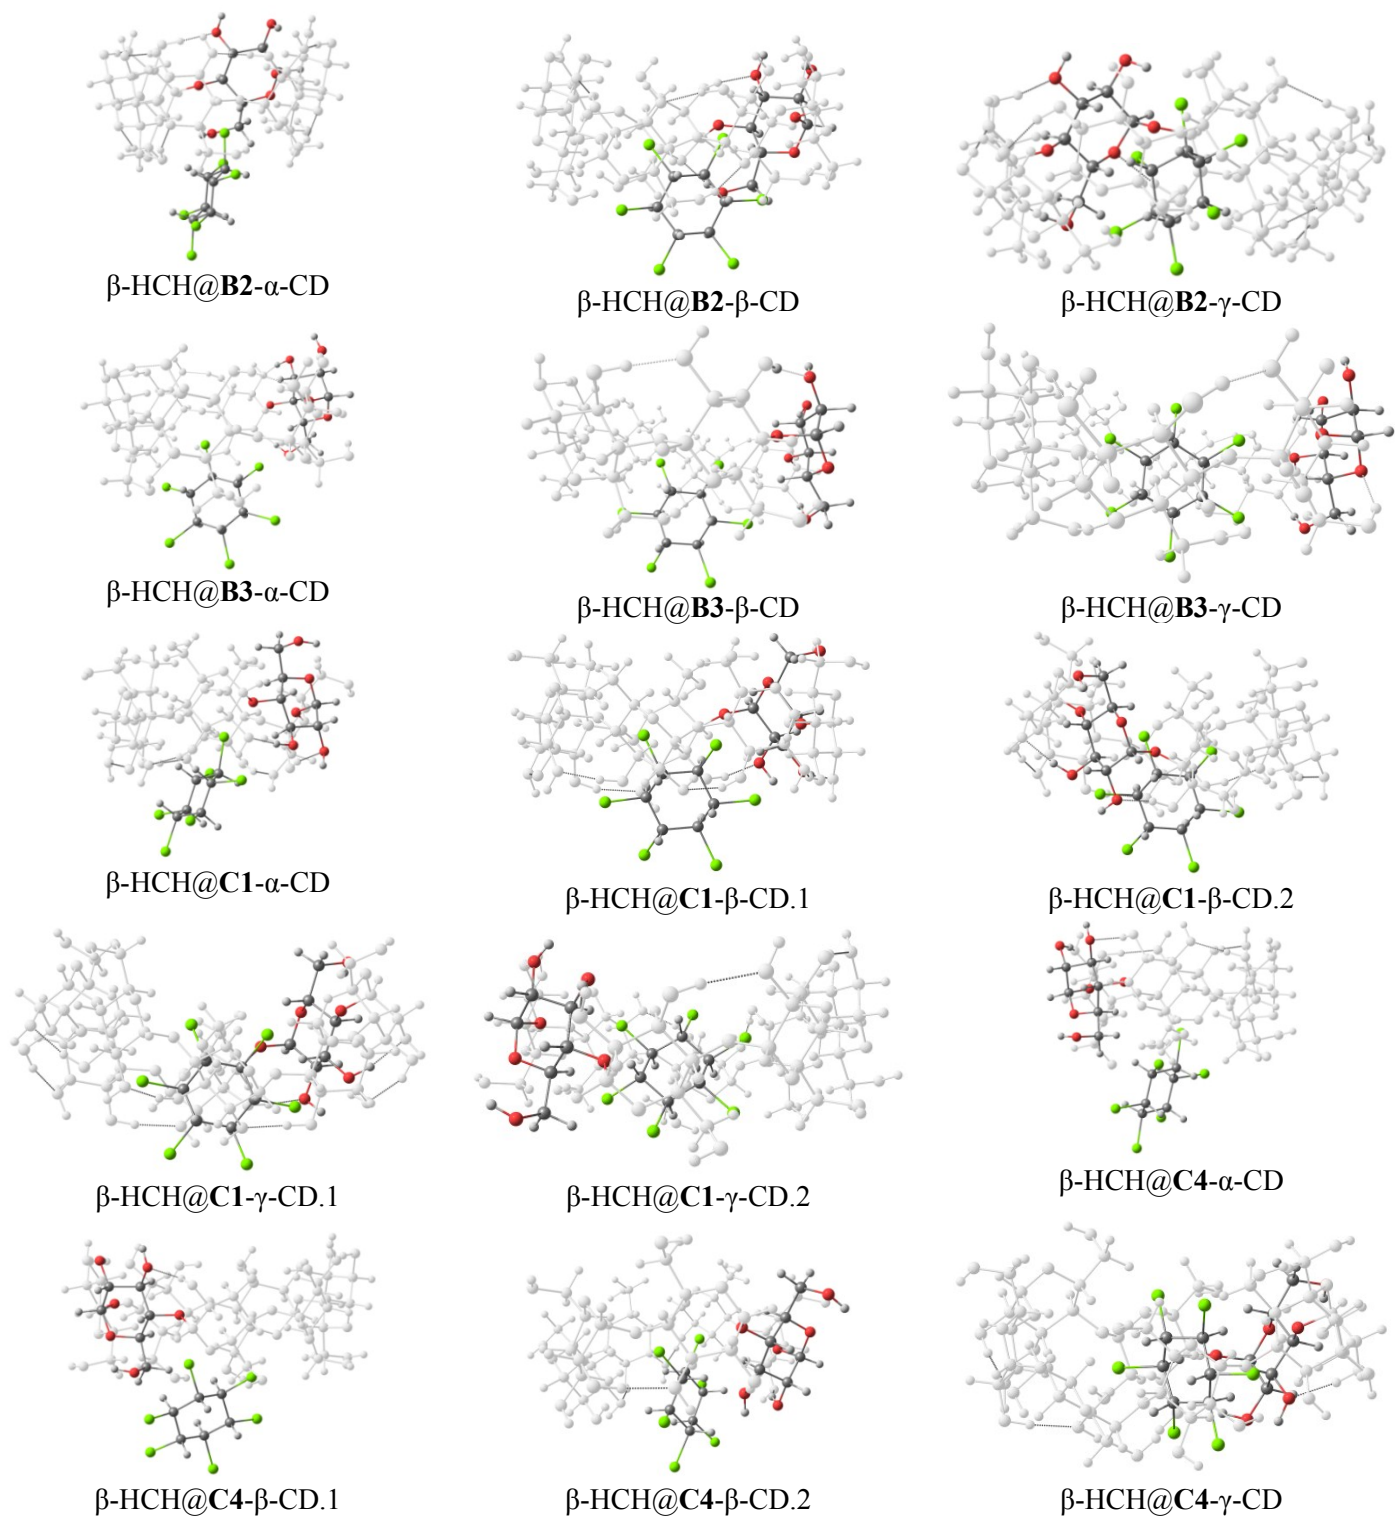

**Figure S1.** Structures reoptimized by DFT M06-2X of the interest complexes for the conformers B2, B3, C1 and C4. Only a glucopyranose unit is highlighted for simplicity.

**Table S6.** Condensed dual descriptor for studied molecules.

| compounds                                               | #   | atoms <sup>a</sup> | $q_N^b$ | $q_{N-1}^b$ | $q_{N+1}^b$ | $\Delta f_A$ |
|---------------------------------------------------------|-----|--------------------|---------|-------------|-------------|--------------|
| <b><math>\beta</math>-HCH</b>                           | 1   | C                  | 0.026   | 0.035       | -0.003      | 0.020        |
|                                                         | 2   | C                  | 0.026   | 0.035       | -0.003      | 0.020        |
|                                                         | 3   | C                  | 0.026   | 0.035       | -0.003      | 0.020        |
|                                                         | 4   | C                  | 0.026   | 0.035       | -0.003      | 0.020        |
|                                                         | 5   | C                  | 0.026   | 0.035       | -0.003      | 0.020        |
|                                                         | 6   | C                  | 0.026   | 0.035       | -0.003      | 0.020        |
|                                                         | 7   | H                  | 0.063   | 0.079       | 0.030       | 0.018        |
|                                                         | 8   | H                  | 0.063   | 0.079       | 0.030       | 0.018        |
|                                                         | 9   | H                  | 0.063   | 0.079       | 0.030       | 0.018        |
|                                                         | 10  | H                  | 0.063   | 0.079       | 0.030       | 0.018        |
|                                                         | 11  | H                  | 0.063   | 0.079       | 0.030       | 0.018        |
|                                                         | 12  | H                  | 0.063   | 0.079       | 0.030       | 0.018        |
|                                                         | 13  | Cl                 | -0.089  | 0.052       | -0.193      | -0.037       |
|                                                         | 14  | Cl                 | -0.089  | 0.052       | -0.193      | -0.037       |
|                                                         | 15  | Cl                 | -0.089  | 0.053       | -0.194      | -0.039       |
|                                                         | 16  | Cl                 | -0.089  | 0.052       | -0.193      | -0.037       |
|                                                         | 17  | Cl                 | -0.089  | 0.054       | -0.194      | -0.039       |
|                                                         | 18  | Cl                 | -0.089  | 0.052       | -0.193      | -0.038       |
| <b><math>\beta</math>-HCH@B2-<math>\alpha</math>-CD</b> | 127 | C                  | 0.025   | 0.026       | -0.001      | 0.027        |
|                                                         | 128 | C                  | 0.026   | 0.026       | 0.000       | 0.026        |
|                                                         | 129 | C                  | 0.021   | 0.021       | -0.007      | 0.028        |
|                                                         | 130 | C                  | 0.028   | 0.028       | -0.001      | 0.029        |
|                                                         | 131 | C                  | 0.023   | 0.024       | -0.008      | 0.029        |
|                                                         | 132 | C                  | 0.026   | 0.026       | -0.001      | 0.026        |
|                                                         | 133 | H                  | 0.061   | 0.061       | 0.029       | 0.032        |
|                                                         | 134 | H                  | 0.063   | 0.063       | 0.032       | 0.031        |
|                                                         | 135 | H                  | 0.035   | 0.035       | 0.014       | 0.020        |
|                                                         | 136 | H                  | 0.058   | 0.059       | 0.025       | 0.032        |



|                                                         |     |    |        |        |        |       |
|---------------------------------------------------------|-----|----|--------|--------|--------|-------|
|                                                         | 137 | H  | 0.040  | 0.041  | 0.015  | 0.024 |
|                                                         | 138 | H  | 0.062  | 0.063  | 0.031  | 0.031 |
|                                                         | 139 | Cl | -0.091 | -0.090 | -0.188 | 0.096 |
|                                                         | 140 | Cl | -0.085 | -0.084 | -0.179 | 0.092 |
|                                                         | 141 | Cl | -0.074 | -0.073 | -0.164 | 0.089 |
|                                                         | 142 | Cl | -0.014 | -0.014 | -0.091 | 0.075 |
|                                                         | 143 | Cl | -0.014 | -0.015 | -0.095 | 0.081 |
|                                                         | 144 | Cl | -0.032 | -0.031 | -0.122 | 0.088 |
| <b><math>\beta</math>-HCH@B2-<math>\beta</math>-CD</b>  | 148 | C  | 0.025  | 0.026  | -0.005 | 0.030 |
|                                                         | 149 | C  | 0.025  | 0.025  | -0.005 | 0.029 |
|                                                         | 150 | C  | 0.029  | 0.030  | 0.001  | 0.028 |
|                                                         | 151 | C  | 0.024  | 0.024  | 0.001  | 0.023 |
|                                                         | 152 | C  | 0.024  | 0.024  | 0.000  | 0.024 |
|                                                         | 153 | C  | 0.026  | 0.026  | 0.001  | 0.025 |
|                                                         | 154 | H  | 0.048  | 0.048  | 0.022  | 0.026 |
|                                                         | 155 | H  | 0.046  | 0.047  | 0.026  | 0.019 |
|                                                         | 156 | H  | 0.063  | 0.064  | 0.034  | 0.029 |
|                                                         | 157 | H  | 0.052  | 0.052  | 0.032  | 0.020 |
|                                                         | 158 | H  | 0.056  | 0.056  | 0.026  | 0.029 |
|                                                         | 159 | H  | 0.048  | 0.048  | 0.029  | 0.019 |
|                                                         | 160 | Cl | -0.032 | -0.032 | -0.127 | 0.095 |
|                                                         | 161 | Cl | -0.005 | -0.004 | -0.080 | 0.075 |
|                                                         | 162 | Cl | -0.031 | -0.030 | -0.128 | 0.096 |
|                                                         | 163 | Cl | -0.015 | -0.014 | -0.092 | 0.077 |
|                                                         | 164 | Cl | -0.088 | -0.088 | -0.179 | 0.090 |
|                                                         | 165 | Cl | -0.090 | -0.089 | -0.179 | 0.089 |
| <b><math>\beta</math>-HCH@B2-<math>\gamma</math>-CD</b> | 169 | C  | 0.023  | 0.023  | 0.000  | 0.023 |
|                                                         | 170 | C  | 0.017  | 0.018  | -0.002 | 0.019 |
|                                                         | 171 | C  | 0.025  | 0.025  | -0.002 | 0.027 |
|                                                         | 172 | C  | 0.025  | 0.026  | -0.002 | 0.027 |
|                                                         | 173 | C  | 0.027  | 0.027  | -0.007 | 0.034 |

|                                                         |     |    |        |        |        |       |
|---------------------------------------------------------|-----|----|--------|--------|--------|-------|
|                                                         | 174 | C  | 0.023  | 0.023  | 0.000  | 0.023 |
|                                                         | 175 | H  | 0.043  | 0.043  | 0.016  | 0.028 |
|                                                         | 176 | H  | 0.040  | 0.041  | 0.022  | 0.018 |
|                                                         | 177 | H  | 0.063  | 0.063  | 0.023  | 0.041 |
|                                                         | 178 | H  | 0.052  | 0.052  | 0.029  | 0.023 |
|                                                         | 179 | H  | 0.061  | 0.061  | 0.010  | 0.052 |
|                                                         | 180 | H  | 0.045  | 0.045  | 0.026  | 0.019 |
|                                                         | 181 | Cl | -0.080 | -0.079 | -0.161 | 0.080 |
|                                                         | 182 | Cl | -0.022 | -0.021 | -0.090 | 0.068 |
|                                                         | 183 | Cl | -0.048 | -0.048 | -0.107 | 0.059 |
|                                                         | 184 | Cl | -0.023 | -0.023 | -0.091 | 0.068 |
|                                                         | 185 | Cl | -0.035 | -0.035 | -0.126 | 0.090 |
|                                                         | 186 | Cl | -0.081 | -0.081 | -0.181 | 0.100 |
| <b><math>\beta</math>-HCH@C1-<math>\alpha</math>-CD</b> | 127 | C  | 0.026  | 0.026  | -0.003 | 0.029 |
|                                                         | 128 | C  | 0.020  | 0.021  | -0.004 | 0.025 |
|                                                         | 129 | C  | 0.025  | 0.025  | -0.002 | 0.027 |
|                                                         | 130 | C  | 0.025  | 0.025  | 0.000  | 0.024 |
|                                                         | 131 | C  | 0.027  | 0.027  | -0.005 | 0.031 |
|                                                         | 132 | C  | 0.026  | 0.027  | -0.001 | 0.025 |
|                                                         | 133 | H  | 0.063  | 0.063  | 0.025  | 0.037 |
|                                                         | 134 | H  | 0.043  | 0.043  | 0.025  | 0.017 |
|                                                         | 135 | H  | 0.062  | 0.062  | 0.025  | 0.036 |
|                                                         | 136 | H  | 0.044  | 0.045  | 0.026  | 0.018 |
|                                                         | 137 | H  | 0.049  | 0.049  | 0.009  | 0.039 |
|                                                         | 138 | H  | 0.049  | 0.049  | 0.030  | 0.018 |
|                                                         | 139 | Cl | -0.064 | -0.063 | -0.159 | 0.095 |
|                                                         | 140 | Cl | -0.027 | -0.026 | -0.107 | 0.079 |
|                                                         | 141 | Cl | -0.095 | -0.094 | -0.192 | 0.096 |
|                                                         | 142 | Cl | -0.072 | -0.071 | -0.165 | 0.093 |
|                                                         | 143 | Cl | -0.026 | -0.025 | -0.116 | 0.090 |
|                                                         | 144 | Cl | -0.030 | -0.030 | -0.108 | 0.077 |

|                                                          |     |        |        |        |        |       |
|----------------------------------------------------------|-----|--------|--------|--------|--------|-------|
| <b><math>\beta</math>-HCH@C1-<math>\beta</math>-CD.1</b> | 148 | C      | 0.025  | 0.026  | -0.001 | 0.025 |
|                                                          | 149 | C      | 0.027  | 0.027  | 0.001  | 0.026 |
|                                                          | 150 | C      | 0.027  | 0.027  | -0.003 | 0.029 |
|                                                          | 151 | C      | 0.023  | 0.023  | -0.004 | 0.027 |
|                                                          | 152 | C      | 0.024  | 0.024  | -0.003 | 0.026 |
|                                                          | 153 | C      | 0.022  | 0.022  | -0.002 | 0.024 |
|                                                          | 154 | H      | 0.059  | 0.060  | 0.025  | 0.033 |
|                                                          | 155 | H      | 0.048  | 0.050  | 0.028  | 0.019 |
|                                                          | 156 | H      | 0.057  | 0.058  | 0.023  | 0.032 |
|                                                          | 157 | H      | 0.042  | 0.042  | 0.025  | 0.017 |
|                                                          | 158 | H      | 0.047  | 0.048  | 0.020  | 0.027 |
|                                                          | 159 | H      | 0.048  | 0.048  | 0.029  | 0.019 |
|                                                          | 160 | Cl     | -0.073 | -0.070 | -0.162 | 0.087 |
|                                                          | 161 | Cl     | -0.093 | -0.091 | -0.189 | 0.094 |
|                                                          | 162 | Cl     | -0.039 | -0.036 | -0.127 | 0.084 |
|                                                          | 163 | Cl     | -0.051 | -0.049 | -0.147 | 0.093 |
| 164                                                      | Cl  | -0.039 | -0.038 | -0.126 | 0.086  |       |
| 165                                                      | Cl  | -0.009 | -0.008 | -0.089 | 0.079  |       |
| <b><math>\beta</math>-HCH@C1-<math>\beta</math>-CD.2</b> | 148 | C      | 0.024  | 0.024  | -0.004 | 0.028 |
|                                                          | 149 | C      | 0.023  | 0.024  | -0.003 | 0.025 |
|                                                          | 150 | C      | 0.026  | 0.026  | -0.004 | 0.029 |
|                                                          | 151 | C      | 0.023  | 0.023  | -0.002 | 0.024 |
|                                                          | 152 | C      | 0.022  | 0.022  | -0.003 | 0.025 |
|                                                          | 153 | C      | 0.021  | 0.021  | -0.004 | 0.025 |
|                                                          | 154 | H      | 0.056  | 0.056  | 0.021  | 0.034 |
|                                                          | 155 | H      | 0.042  | 0.044  | 0.022  | 0.018 |
|                                                          | 156 | H      | 0.054  | 0.054  | 0.022  | 0.032 |
|                                                          | 157 | H      | 0.042  | 0.042  | 0.026  | 0.016 |
|                                                          | 158 | H      | 0.038  | 0.038  | 0.017  | 0.021 |
|                                                          | 159 | H      | 0.044  | 0.045  | 0.025  | 0.019 |
|                                                          | 160 | Cl     | -0.078 | -0.076 | -0.178 | 0.099 |

|                                                           |     |    |        |        |        |       |
|-----------------------------------------------------------|-----|----|--------|--------|--------|-------|
|                                                           | 161 | Cl | -0.096 | -0.094 | -0.195 | 0.098 |
|                                                           | 162 | Cl | -0.017 | -0.017 | -0.093 | 0.075 |
|                                                           | 163 | Cl | -0.061 | -0.059 | -0.160 | 0.098 |
|                                                           | 164 | Cl | -0.048 | -0.047 | -0.136 | 0.088 |
|                                                           | 165 | Cl | 0.008  | 0.009  | -0.058 | 0.066 |
| <b><math>\beta</math>-HCH@C1-<math>\gamma</math>-CD.1</b> | 169 | C  | 0.021  | 0.021  | -0.002 | 0.023 |
|                                                           | 170 | C  | 0.027  | 0.027  | 0.002  | 0.025 |
|                                                           | 171 | C  | 0.024  | 0.024  | -0.003 | 0.027 |
|                                                           | 172 | C  | 0.026  | 0.026  | -0.003 | 0.028 |
|                                                           | 173 | C  | 0.024  | 0.024  | -0.003 | 0.027 |
|                                                           | 174 | C  | 0.022  | 0.022  | -0.003 | 0.025 |
|                                                           | 175 | H  | 0.044  | 0.044  | 0.025  | 0.018 |
|                                                           | 176 | H  | 0.047  | 0.047  | 0.023  | 0.024 |
|                                                           | 177 | H  | 0.044  | 0.044  | 0.026  | 0.018 |
|                                                           | 178 | H  | 0.057  | 0.057  | 0.027  | 0.030 |
|                                                           | 179 | H  | 0.043  | 0.043  | 0.023  | 0.019 |
|                                                           | 180 | H  | 0.041  | 0.042  | 0.021  | 0.021 |
|                                                           | 181 | Cl | -0.074 | -0.073 | -0.166 | 0.091 |
|                                                           | 182 | Cl | -0.077 | -0.076 | -0.170 | 0.093 |
|                                                           | 183 | Cl | -0.032 | -0.032 | -0.113 | 0.081 |
|                                                           | 184 | Cl | -0.056 | -0.056 | -0.148 | 0.091 |
|                                                           | 185 | Cl | -0.042 | -0.041 | -0.131 | 0.088 |
|                                                           | 186 | Cl | -0.069 | -0.069 | -0.167 | 0.098 |
| <b><math>\beta</math>-HCH@C1-<math>\gamma</math>-CD.2</b> | 169 | C  | 0.026  | 0.027  | -0.001 | 0.027 |
|                                                           | 170 | C  | 0.027  | 0.027  | 0.002  | 0.025 |
|                                                           | 171 | C  | 0.029  | 0.029  | 0.001  | 0.028 |
|                                                           | 172 | C  | 0.020  | 0.020  | -0.006 | 0.025 |
|                                                           | 173 | C  | 0.028  | 0.029  | -0.001 | 0.029 |
|                                                           | 174 | C  | 0.026  | 0.027  | 0.002  | 0.024 |
|                                                           | 175 | H  | 0.062  | 0.063  | 0.021  | 0.040 |
|                                                           | 176 | H  | 0.056  | 0.057  | 0.035  | 0.020 |

|     |    |        |        |        |       |
|-----|----|--------|--------|--------|-------|
| 177 | H  | 0.065  | 0.065  | 0.026  | 0.038 |
| 178 | H  | 0.038  | 0.039  | 0.020  | 0.018 |
| 179 | H  | 0.059  | 0.060  | 0.018  | 0.040 |
| 180 | H  | 0.053  | 0.054  | 0.035  | 0.017 |
| 181 | Cl | -0.057 | -0.054 | -0.140 | 0.081 |
| 182 | Cl | -0.025 | -0.024 | -0.100 | 0.074 |
| 183 | Cl | -0.034 | -0.033 | -0.110 | 0.076 |
| 184 | Cl | -0.047 | -0.046 | -0.134 | 0.086 |
| 185 | Cl | -0.022 | -0.021 | -0.103 | 0.080 |
| 186 | Cl | -0.048 | -0.047 | -0.134 | 0.084 |

<sup>a</sup> Only the pesticide atoms are showed in the case of the complexes to ease the comparison.

<sup>b</sup> The atom charges were estimated using the Hirshfeld population analysis.

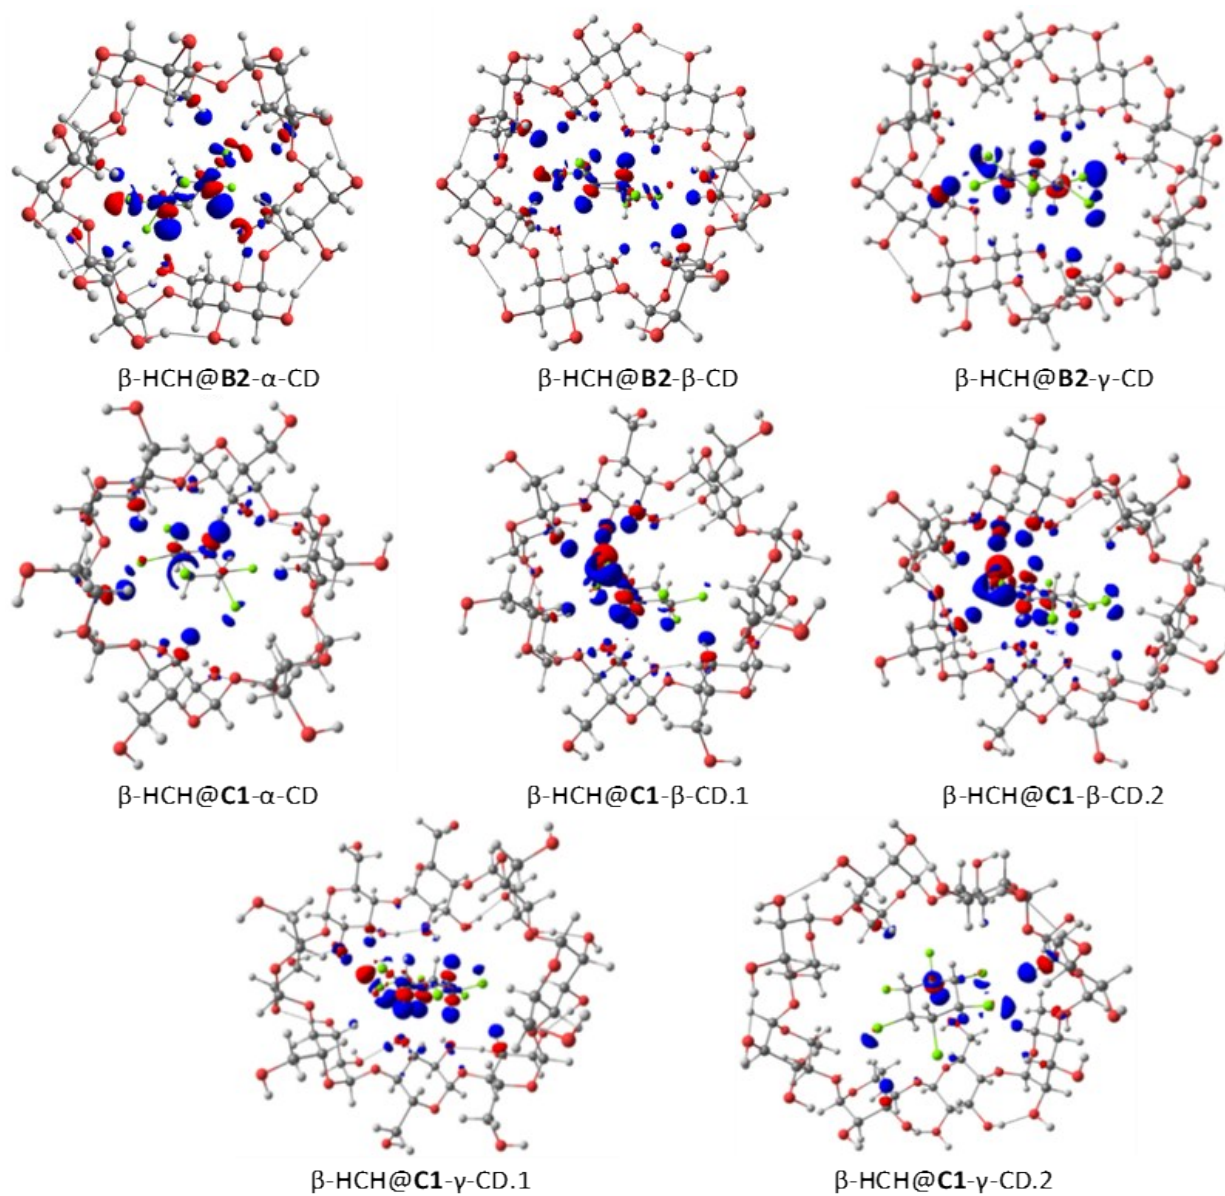

**Figure S2.** Charge transfer process during the formation of the complexes of the conformers B2 and C1 (isosurface contour value  $0.8 \cdot 10^{-3}$  a.u). The complexes are shown from an upper view.

**Table S7.** QTAIM analysis of the inclusion complexes  $\beta$ -HCH@CD.

| complexes                                               | interaction number | atoms ( $\beta$ -HCH...CD) | d (Å) | $\rho$ ( $ea_0^{-3}$ ) | $\nabla^2\rho$ ( $ea_0^{-5}$ ) | H (au)  | V/G   | $\epsilon$ | interaction type |
|---------------------------------------------------------|--------------------|----------------------------|-------|------------------------|--------------------------------|---------|-------|------------|------------------|
| <b><math>\beta</math>-HCH@B2-<math>\alpha</math>-CD</b> | 1                  | Cl143...H105               | 2.64  | 0.0097                 | 0.035                          | 0.00126 | -0.83 | 0.32       | vdW              |
|                                                         | 2                  | Cl143...H70                | 3.04  | 0.0062                 | 0.020                          | 0.00089 | -0.78 | 0.49       | vdW              |
|                                                         | 3                  | Cl143...H81                | 2.80  | 0.0086                 | 0.029                          | 0.00127 | -0.79 | 0.25       | vdW              |
|                                                         | 4                  | Cl143...H102               | 2.93  | 0.0082                 | 0.028                          | 0.00120 | -0.79 | 0.49       | vdW              |
|                                                         | 5                  | Cl143...H91                | 3.04  | 0.0062                 | 0.019                          | 0.00085 | -0.78 | 0.67       | vdW              |
|                                                         | 6                  | Cl144...H112               | 3.34  | 0.0029                 | 0.009                          | 0.00051 | -0.69 | 0.12       | vdW              |
|                                                         | 7                  | Cl142...H18                | 3.09  | 0.0053                 | 0.017                          | 0.00075 | -0.79 | 0.19       | vdW              |
|                                                         | 8                  | Cl141...H18                | 2.94  | 0.0065                 | 0.020                          | 0.00095 | -0.77 | 0.05       | vdW              |
|                                                         | 9                  | Cl144...H70                | 3.23  | 0.0037                 | 0.011                          | 0.00059 | -0.72 | 0.28       | vdW              |
|                                                         | 10                 | Cl144...H49                | 3.01  | 0.0055                 | 0.017                          | 0.00088 | -0.74 | 0.12       | vdW              |
|                                                         | 11                 | Cl144...H60                | 3.24  | 0.0042                 | 0.013                          | 0.00062 | -0.76 | 0.67       | vdW              |
|                                                         | 12                 | Cl142...H60                | 2.85  | 0.0075                 | 0.024                          | 0.00115 | -0.76 | 0.13       | vdW              |
|                                                         | 13                 | Cl142...H39                | 2.77  | 0.0085                 | 0.032                          | 0.00144 | -0.78 | 0.43       | vdW              |
|                                                         | 14                 | Cl142...H28                | 2.94  | 0.0069                 | 0.022                          | 0.00096 | -0.79 | 0.34       | vdW              |
|                                                         | 15                 | Cl142...H42                | 2.66  | 0.0100                 | 0.036                          | 0.00134 | -0.82 | 0.19       | Weak H-bond      |
|                                                         | 16                 | Cl142...H7                 | 3.23  | 0.0042                 | 0.013                          | 0.00061 | -0.77 | 0.23       | vdW              |
|                                                         | 17                 | Cl144...H7                 | 3.41  | 0.0027                 | 0.008                          | 0.00043 | -0.71 | 0.22       | vdW              |
|                                                         | 18                 | Cl144...O80                | 3.82  | 0.0033                 | 0.010                          | 0.00053 | -0.75 | 0.19       | vdW              |
|                                                         | 19                 | H136...O80                 | 3.08  | 0.0031                 | 0.011                          | 0.00053 | -0.76 | 0.32       | vdW              |
|                                                         | 20                 | H135...O17                 | 2.06  | 0.0204                 | 0.078                          | 0.00196 | -0.89 | 0.07       | H-bond           |
|                                                         | 21                 | H137...O122                | 2.18  | 0.0158                 | 0.060                          | 0.00194 | -0.85 | 0.09       | H-bond           |
| <b><math>\beta</math>-HCH@B2-<math>\beta</math>-CD</b>  | 1                  | Cl162...H49                | 3.14  | 0.0043                 | 0.013                          | 0.00069 | -0.73 | 0.16       | vdW              |
|                                                         | 2                  | Cl162...H70                | 2.72  | 0.0090                 | 0.030                          | 0.00134 | -0.78 | 0.09       | vdW              |
|                                                         | 3                  | Cl162...H146               | 2.95  | 0.0065                 | 0.020                          | 0.00094 | -0.77 | 0.10       | vdW              |
|                                                         | 4                  | H156...H146                | 2.45  | 0.0048                 | 0.016                          | 0.00082 | -0.74 | 1.05       | vdW              |
|                                                         | 5                  | Cl163...H81                | 2.86  | 0.0074                 | 0.024                          | 0.00114 | -0.76 | 0.12       | vdW              |
|                                                         | 6                  | Cl163...H49                | 3.00  | 0.0064                 | 0.020                          | 0.00084 | -0.79 | 0.15       | vdW              |

|                                                         |    |              |      |        |       |         |       |      |             |
|---------------------------------------------------------|----|--------------|------|--------|-------|---------|-------|------|-------------|
|                                                         | 7  | Cl163...H63  | 2.57 | 0.0115 | 0.042 | 0.00145 | -0.84 | 0.25 | Weak H-bond |
|                                                         | 8  | Cl163...H39  | 2.99 | 0.0062 | 0.019 | 0.00086 | -0.77 | 0.09 | vdW         |
|                                                         | 9  | H155...H28   | 2.22 | 0.0065 | 0.021 | 0.00097 | -0.78 | 0.26 | vdW         |
|                                                         | 10 | H155...O38   | 2.41 | 0.0107 | 0.036 | 0.00108 | -0.86 | 0.11 | Weak H-bond |
|                                                         | 11 | H154...H91   | 2.76 | 0.0023 | 0.008 | 0.00045 | -0.70 | 0.41 | vdW         |
|                                                         | 12 | H154...O120  | 2.43 | 0.0104 | 0.034 | 0.00099 | -0.87 | 0.06 | Weak H-bond |
|                                                         | 13 | H158...O120  | 2.92 | 0.0040 | 0.014 | 0.00060 | -0.79 | 0.35 | vdW         |
|                                                         | 14 | H157...O38   | 2.61 | 0.0067 | 0.023 | 0.00082 | -0.83 | 0.12 | vdW         |
|                                                         | 15 | Cl160...H7   | 2.89 | 0.0072 | 0.023 | 0.00109 | -0.76 | 0.12 | vdW         |
|                                                         | 16 | Cl160...O139 | 3.62 | 0.0039 | 0.014 | 0.00066 | -0.76 | 0.26 | vdW         |
|                                                         | 17 | Cl160...H133 | 3.25 | 0.0029 | 0.009 | 0.00053 | -0.71 | 0.38 | vdW         |
|                                                         | 18 | Cl160...H18  | 3.23 | 0.0046 | 0.013 | 0.00056 | -0.80 | 0.58 | vdW         |
|                                                         | 19 | Cl160...H131 | 2.89 | 0.0069 | 0.022 | 0.00105 | -0.76 | 0.01 | vdW         |
|                                                         | 20 | Cl160...O118 | 3.76 | 0.0034 | 0.011 | 0.00057 | -0.75 | 0.67 | vdW         |
|                                                         | 21 | Cl160...H110 | 2.97 | 0.0058 | 0.018 | 0.00095 | -0.74 | 0.07 | vdW         |
|                                                         | 22 | H159...O38   | 2.58 | 0.0075 | 0.024 | 0.00080 | -0.85 | 0.06 | vdW         |
|                                                         | 23 | H159...H18   | 2.38 | 0.0068 | 0.024 | 0.00105 | -0.79 | 2.08 | vdW         |
|                                                         | 24 | Cl161...H18  | 2.78 | 0.0086 | 0.028 | 0.00124 | -0.79 | 0.09 | vdW         |
|                                                         | 25 | Cl161...O120 | 3.36 | 0.0066 | 0.024 | 0.00096 | -0.81 | 1.32 | vdW         |
|                                                         | 26 | Cl161...H110 | 3.02 | 0.0067 | 0.021 | 0.00090 | -0.80 | 0.51 | vdW         |
|                                                         | 27 | Cl161...H121 | 2.85 | 0.0087 | 0.029 | 0.00123 | -0.80 | 0.26 | vdW         |
|                                                         | 28 | Cl161...H145 | 2.64 | 0.0094 | 0.034 | 0.00129 | -0.82 | 0.32 | vdW         |
|                                                         | 29 | Cl161...H131 | 2.88 | 0.0081 | 0.025 | 0.00104 | -0.80 | 0.12 | vdW         |
| <b><math>\beta</math>-HCH@B2-<math>\gamma</math>-CD</b> | 1  | Cl185...H93  | 3.11 | 0.0044 | 0.014 | 0.00075 | -0.72 | 0.12 | vdW         |
|                                                         | 2  | Cl185...O78  | 3.63 | 0.0042 | 0.014 | 0.00066 | -0.78 | 1.92 | vdW         |
|                                                         | 3  | Cl185...H72  | 2.92 | 0.0053 | 0.018 | 0.00093 | -0.74 | 0.04 | vdW         |
|                                                         | 4  | Cl185...O57  | 3.53 | 0.0048 | 0.016 | 0.00070 | -0.79 | 0.12 | vdW         |
|                                                         | 5  | Cl185...H49  | 3.12 | 0.0045 | 0.013 | 0.00072 | -0.73 | 0.01 | vdW         |
|                                                         | 6  | Cl185...H70  | 2.76 | 0.0089 | 0.029 | 0.00129 | -0.78 | 0.06 | vdW         |
|                                                         | 7  | Cl182...H112 | 3.20 | 0.0044 | 0.013 | 0.00065 | -0.75 | 0.31 | vdW         |



|                                                         |    |              |      |        |       |         |       |      |             |
|---------------------------------------------------------|----|--------------|------|--------|-------|---------|-------|------|-------------|
|                                                         | 8  | Cl182...H123 | 2.93 | 0.0060 | 0.020 | 0.00096 | -0.76 | 0.20 | vdW         |
|                                                         | 9  | Cl182...H91  | 2.74 | 0.0085 | 0.028 | 0.00134 | -0.77 | 0.09 | vdW         |
|                                                         | 10 | Cl182...O101 | 3.28 | 0.0070 | 0.025 | 0.00094 | -0.82 | 0.06 | vdW         |
|                                                         | 11 | Cl182...H70  | 2.74 | 0.0096 | 0.031 | 0.00134 | -0.79 | 0.15 | vdW         |
|                                                         | 12 | Cl182...O80  | 3.30 | 0.0074 | 0.027 | 0.00096 | -0.83 | 0.32 | vdW         |
|                                                         | 13 | H180...O80   | 2.50 | 0.0094 | 0.031 | 0.00089 | -0.87 | 0.10 | vdW         |
|                                                         | 14 | H180...H49   | 2.34 | 0.0051 | 0.016 | 0.00074 | -0.78 | 0.15 | vdW         |
|                                                         | 15 | H180...H60   | 2.58 | 0.0035 | 0.012 | 0.00064 | -0.74 | 1.26 | vdW         |
|                                                         | 16 | Cl186...H30  | 3.21 | 0.0035 | 0.011 | 0.00066 | -0.69 | 0.15 | vdW         |
|                                                         | 17 | H179...H114  | 3.19 | 0.0007 | 0.003 | 0.00021 | -0.52 | 1.67 | vdW         |
|                                                         | 18 | H175...O143  | 2.37 | 0.0113 | 0.040 | 0.00126 | -0.85 | 0.08 | Weak H-bond |
|                                                         | 19 | Cl181...H60  | 3.54 | 0.0021 | 0.006 | 0.00037 | -0.69 | 0.88 | vdW         |
|                                                         | 20 | Cl181...H144 | 3.17 | 0.0043 | 0.014 | 0.00068 | -0.75 | 0.11 | vdW         |
|                                                         | 21 | H178...H49   | 2.56 | 0.0035 | 0.011 | 0.00053 | -0.76 | 0.27 | vdW         |
|                                                         | 22 | H178...O36   | 3.02 | 0.0029 | 0.011 | 0.00060 | -0.71 | 0.05 | vdW         |
|                                                         | 23 | H178...O59   | 3.09 | 0.0032 | 0.011 | 0.00054 | -0.74 | 0.73 | vdW         |
|                                                         | 24 | H176...O59   | 2.42 | 0.0096 | 0.033 | 0.00115 | -0.84 | 0.12 | vdW         |
|                                                         | 25 | Cl183...H144 | 3.07 | 0.0055 | 0.017 | 0.00075 | -0.78 | 0.29 | vdW         |
|                                                         | 26 | Cl183...H133 | 2.98 | 0.0065 | 0.020 | 0.00089 | -0.78 | 0.16 | vdW         |
|                                                         | 27 | Cl183...O164 | 2.94 | 0.0122 | 0.047 | 0.00150 | -0.85 | 0.12 | vdWa        |
|                                                         | 28 | Cl183...H154 | 3.04 | 0.0051 | 0.016 | 0.00084 | -0.74 | 0.29 | vdW         |
|                                                         | 29 | Cl184...H28  | 2.78 | 0.0091 | 0.029 | 0.00133 | -0.78 | 0.02 | vdW         |
|                                                         | 30 | Cl184...O15  | 3.15 | 0.0086 | 0.031 | 0.00107 | -0.84 | 0.13 | vdW         |
|                                                         | 31 | Cl184...H7   | 2.70 | 0.0083 | 0.029 | 0.00142 | -0.76 | 0.00 | vdW         |
|                                                         | 32 | Cl184...H9   | 2.90 | 0.0058 | 0.019 | 0.00101 | -0.74 | 0.03 | vdW         |
| <b><math>\beta</math>-HCH@B3-<math>\alpha</math>-CD</b> | 1  | Cl143...H60  | 3.11 | 0.0051 | 0.015 | 0.00072 | -0.77 | 0.25 | vdW         |
|                                                         | 2  | Cl143...H49  | 3.08 | 0.0052 | 0.016 | 0.00075 | -0.77 | 0.19 | vdW         |
|                                                         | 3  | Cl143...O80  | 2.91 | 0.0135 | 0.050 | 0.00145 | -0.87 | 0.05 | vdWa        |
|                                                         | 4  | Cl143...H70  | 2.77 | 0.0080 | 0.027 | 0.00124 | -0.77 | 0.02 | vdW         |
|                                                         | 5  | Cl143...H102 | 2.74 | 0.0096 | 0.031 | 0.00136 | -0.79 | 0.03 | vdW         |

|                                                        |    |              |      |        |       |         |       |      |             |
|--------------------------------------------------------|----|--------------|------|--------|-------|---------|-------|------|-------------|
|                                                        | 6  | Cl143...H91  | 2.94 | 0.0067 | 0.021 | 0.00096 | -0.78 | 0.31 | vdW         |
|                                                        | 7  | Cl140...H100 | 2.84 | 0.0075 | 0.025 | 0.00120 | -0.76 | 0.08 | vdW         |
|                                                        | 8  | Cl140...O122 | 3.36 | 0.0061 | 0.022 | 0.00086 | -0.82 | 0.06 | vdW         |
|                                                        | 9  | H137...O122  | 2.44 | 0.0105 | 0.035 | 0.00105 | -0.86 | 0.17 | Weak H-bond |
|                                                        | 10 | H133...O122  | 2.34 | 0.0119 | 0.042 | 0.00136 | -0.85 | 0.09 | Weak H-bond |
|                                                        | 11 | Cl144...H49  | 3.15 | 0.0044 | 0.013 | 0.00067 | -0.75 | 0.17 | vdW         |
|                                                        | 12 | H136...O59   | 2.38 | 0.0107 | 0.038 | 0.00123 | -0.85 | 0.13 | Weak H-bond |
|                                                        | 13 | Cl144...H28  | 2.82 | 0.0077 | 0.025 | 0.00121 | -0.76 | 0.08 | vdW         |
|                                                        | 14 | Cl144...H7   | 2.76 | 0.0088 | 0.028 | 0.00129 | -0.78 | 0.06 | vdW         |
|                                                        | 15 | Cl144...H112 | 3.22 | 0.0038 | 0.011 | 0.00061 | -0.72 | 0.09 | vdW         |
|                                                        | 16 | Cl141...H18  | 3.31 | 0.0036 | 0.011 | 0.00053 | -0.76 | 4.13 | vdW         |
|                                                        | 17 | H135...O17   | 2.22 | 0.0151 | 0.055 | 0.00159 | -0.87 | 0.05 | Weak H-bond |
|                                                        | 18 | Cl142...H18  | 2.83 | 0.0087 | 0.028 | 0.00117 | -0.80 | 0.22 | vdW         |
|                                                        | 19 | Cl142...H7   | 2.87 | 0.0082 | 0.027 | 0.00107 | -0.81 | 0.21 | vdW         |
|                                                        | 20 | Cl142...H42  | 2.47 | 0.0137 | 0.050 | 0.00171 | -0.84 | 0.21 | Weak H-bond |
|                                                        | 21 | Cl142...H28  | 3.03 | 0.0064 | 0.020 | 0.00087 | -0.79 | 0.66 | vdW         |
|                                                        | 22 | Cl142...H39  | 2.91 | 0.0078 | 0.031 | 0.00144 | -0.77 | 6.79 | vdW         |
| <b><math>\beta</math>-HCH@B3-<math>\beta</math>-CD</b> | 1  | Cl162...H60  | 2.93 | 0.0068 | 0.021 | 0.00095 | -0.78 | 0.09 | vdW         |
|                                                        | 2  | Cl162...H70  | 2.96 | 0.0069 | 0.022 | 0.00091 | -0.80 | 0.20 | vdW         |
|                                                        | 3  | Cl162...H84  | 2.61 | 0.0108 | 0.039 | 0.00140 | -0.83 | 0.22 | Weak H-bond |
|                                                        | 4  | Cl162...H81  | 2.95 | 0.0069 | 0.027 | 0.00128 | -0.77 | 1.52 | vdW         |
|                                                        | 5  | Cl162...H146 | 2.79 | 0.0084 | 0.027 | 0.00126 | -0.77 | 0.11 | vdW         |
|                                                        | 6  | Cl163...H70  | 3.06 | 0.0050 | 0.015 | 0.00080 | -0.74 | 0.11 | vdW         |
|                                                        | 7  | Cl163...H146 | 3.18 | 0.0048 | 0.015 | 0.00066 | -0.78 | 1.94 | vdW         |
|                                                        | 8  | Cl163...H91  | 2.68 | 0.0098 | 0.033 | 0.00142 | -0.79 | 0.10 | vdW         |
|                                                        | 9  | Cl163...H121 | 2.96 | 0.0064 | 0.019 | 0.00094 | -0.76 | 0.12 | vdW         |
|                                                        | 10 | H155...H121  | 2.39 | 0.0052 | 0.017 | 0.00082 | -0.76 | 0.54 | vdW         |
|                                                        | 11 | H157...H119  | 2.80 | 0.0025 | 0.009 | 0.00052 | -0.70 | 0.58 | vdW         |
|                                                        | 12 | H157...H110  | 2.70 | 0.0026 | 0.009 | 0.00048 | -0.71 | 0.04 | vdW         |
|                                                        | 13 | H157...O141  | 2.59 | 0.0079 | 0.025 | 0.00074 | -0.86 | 0.06 | vdW         |

|                                                         |    |              |      |        |       |         |       |      |                  |
|---------------------------------------------------------|----|--------------|------|--------|-------|---------|-------|------|------------------|
|                                                         | 14 | H154...H60   | 2.42 | 0.0047 | 0.017 | 0.00080 | -0.78 | 3.70 | vdW              |
|                                                         | 15 | H154...O59   | 2.63 | 0.0066 | 0.023 | 0.00081 | -0.83 | 0.12 | vdW              |
|                                                         | 16 | H156...H49   | 2.21 | 0.0069 | 0.022 | 0.00098 | -0.79 | 0.31 | vdW              |
|                                                         | 17 | H156...O59   | 2.36 | 0.0118 | 0.040 | 0.00120 | -0.87 | 0.10 | Weak H-bond      |
|                                                         | 18 | H158...O59   | 2.56 | 0.0078 | 0.025 | 0.00081 | -0.85 | 0.07 | vdW              |
|                                                         | 19 | H158...H39   | 2.35 | 0.0072 | 0.026 | 0.00106 | -0.80 | 2.14 | vdW              |
|                                                         | 20 | Cl165...H28  | 2.89 | 0.0072 | 0.023 | 0.00109 | -0.76 | 0.11 | vdW              |
|                                                         | 21 | Cl165...H39  | 3.27 | 0.0043 | 0.013 | 0.00054 | -0.79 | 1.45 | vdW              |
|                                                         | 22 | Cl165...O15  | 3.63 | 0.0038 | 0.013 | 0.00064 | -0.76 | 0.18 | vdW              |
|                                                         | 23 | Cl165...H7   | 2.98 | 0.0059 | 0.018 | 0.00090 | -0.76 | 0.15 | vdW              |
|                                                         | 24 | Cl165...H9   | 3.37 | 0.0023 | 0.008 | 0.00044 | -0.69 | 0.60 | vdW              |
|                                                         | 25 | Cl165...H131 | 3.07 | 0.0047 | 0.015 | 0.00080 | -0.72 | 0.13 | vdW              |
|                                                         | 26 | Cl164...H39  | 2.68 | 0.0103 | 0.034 | 0.00141 | -0.80 | 0.06 | Weak H-bond      |
|                                                         | 27 | Cl164...H7   | 2.78 | 0.0091 | 0.030 | 0.00124 | -0.80 | 0.05 | vdW              |
|                                                         | 28 | Cl164...O17  | 2.82 | 0.0163 | 0.062 | 0.00168 | -1.14 | 0.05 | vdW <sup>a</sup> |
|                                                         | 29 | Cl164...O141 | 3.34 | 0.0068 | 0.024 | 0.00093 | -0.82 | 0.38 | vdW              |
|                                                         | 30 | Cl164...H131 | 3.08 | 0.0057 | 0.018 | 0.00078 | -0.79 | 0.61 | vdW              |
|                                                         | 31 | Cl164...H142 | 2.87 | 0.0081 | 0.027 | 0.00117 | -0.79 | 0.23 | vdW              |
|                                                         | 32 | H159...O141  | 3.08 | 0.0030 | 0.011 | 0.00056 | -0.75 | 1.29 | vdW              |
| <b><math>\beta</math>-HCH@B3-<math>\gamma</math>-CD</b> | 1  | H175...H154  | 2.86 | 0.0016 | 0.006 | 0.00038 | -0.64 | 0.07 | vdW              |
|                                                         | 2  | H175...O17   | 2.85 | 0.0044 | 0.015 | 0.00063 | -0.80 | 0.11 | vdW              |
|                                                         | 3  | Cl183...H7   | 3.21 | 0.0035 | 0.011 | 0.00064 | -0.69 | 0.04 | vdW              |
|                                                         | 4  | Cl183...H28  | 2.62 | 0.0104 | 0.036 | 0.00157 | -0.79 | 0.08 | Weak H-bond      |
|                                                         | 5  | Cl183...H49  | 3.25 | 0.0037 | 0.011 | 0.00057 | -0.74 | 0.08 | vdW              |
|                                                         | 6  | Cl181...H39  | 3.44 | 0.0027 | 0.008 | 0.00046 | -0.71 | 0.08 | vdW              |
|                                                         | 7  | Cl181...H60  | 2.95 | 0.0065 | 0.021 | 0.00103 | -0.76 | 0.30 | vdW              |
|                                                         | 8  | Cl181...H81  | 3.04 | 0.0059 | 0.018 | 0.00083 | -0.77 | 0.24 | vdW              |
|                                                         | 9  | H176...H81   | 2.29 | 0.0055 | 0.018 | 0.00084 | -0.77 | 0.13 | vdW              |
|                                                         | 10 | H178...H70   | 2.95 | 0.0014 | 0.005 | 0.00033 | -0.62 | 1.03 | vdW              |
|                                                         | 11 | H178...O101  | 3.03 | 0.0037 | 0.012 | 0.00054 | -0.78 | 0.19 | vdW              |

|                                                         |    |              |      |        |       |         |       |      |             |
|---------------------------------------------------------|----|--------------|------|--------|-------|---------|-------|------|-------------|
|                                                         | 12 | H178...H91   | 2.42 | 0.0042 | 0.013 | 0.00065 | -0.76 | 0.08 | vdW         |
|                                                         | 13 | H180...H79   | 2.60 | 0.0029 | 0.010 | 0.00055 | -0.71 | 0.45 | vdW         |
|                                                         | 14 | H180...O101  | 2.49 | 0.0088 | 0.029 | 0.00096 | -0.85 | 0.07 | vdW         |
|                                                         | 15 | Cl185...O101 | 3.38 | 0.0063 | 0.022 | 0.00087 | -0.81 | 0.25 | vdW         |
|                                                         | 16 | Cl185...H102 | 2.96 | 0.0068 | 0.023 | 0.00102 | -0.78 | 0.18 | vdW         |
|                                                         | 17 | Cl185...H91  | 3.12 | 0.0053 | 0.016 | 0.00071 | -0.78 | 0.43 | vdW         |
|                                                         | 18 | Cl185...O122 | 3.10 | 0.0096 | 0.034 | 0.00112 | -0.85 | 0.04 | vdW         |
|                                                         | 19 | Cl185...H112 | 3.02 | 0.0056 | 0.017 | 0.00083 | -0.76 | 0.05 | vdW         |
|                                                         | 20 | Cl185...H144 | 2.91 | 0.0068 | 0.022 | 0.00103 | -0.76 | 0.15 | vdW         |
|                                                         | 21 | Cl186...H114 | 2.79 | 0.0074 | 0.025 | 0.00121 | -0.76 | 0.09 | vdW         |
|                                                         | 22 | Cl186...H112 | 2.94 | 0.0062 | 0.020 | 0.00095 | -0.76 | 0.05 | vdW         |
|                                                         | 23 | Cl186...O120 | 3.18 | 0.0080 | 0.029 | 0.00102 | -0.84 | 0.06 | vdW         |
|                                                         | 24 | Cl186...H135 | 3.15 | 0.0042 | 0.013 | 0.00069 | -0.73 | 0.20 | vdW         |
|                                                         | 25 | Cl186...H133 | 2.95 | 0.0065 | 0.020 | 0.00095 | -0.76 | 0.01 | vdW         |
|                                                         | 26 | H179...O164  | 2.42 | 0.0103 | 0.035 | 0.00110 | -0.86 | 0.11 | Weak H-bond |
|                                                         | 27 | Cl182...H165 | 3.01 | 0.0056 | 0.017 | 0.00086 | -0.75 | 0.07 | vdW         |
| <b><math>\beta</math>-HCH@C1-<math>\alpha</math>-CD</b> | 1  | Cl140...H30  | 3.20 | 0.0043 | 0.012 | 0.00059 | -0.77 | 0.31 | vdW         |
|                                                         | 2  | Cl140...O35  | 3.40 | 0.0061 | 0.021 | 0.00088 | -0.80 | 0.23 | vdW         |
|                                                         | 3  | Cl140...H51  | 2.57 | 0.0104 | 0.037 | 0.00164 | -0.79 | 0.05 | Weak H-bond |
|                                                         | 4  | Cl140...H72  | 2.88 | 0.0070 | 0.022 | 0.00106 | -0.76 | 0.03 | vdW         |
|                                                         | 5  | Cl139...O76  | 3.81 | 0.0030 | 0.010 | 0.00055 | -0.72 | 0.23 | vdW         |
|                                                         | 6  | Cl139...H72  | 3.47 | 0.0030 | 0.009 | 0.00042 | -0.77 | 0.93 | vdW         |
|                                                         | 7  | Cl139...O77  | 3.56 | 0.0050 | 0.017 | 0.00076 | -0.78 | 0.49 | vdW         |
|                                                         | 8  | Cl139...O97  | 3.47 | 0.0060 | 0.020 | 0.00079 | -0.81 | 0.57 | vdW         |
|                                                         | 9  | H138...O97   | 2.63 | 0.0076 | 0.028 | 0.00095 | -0.84 | 1.43 | vdW         |
|                                                         | 10 | H138...H93   | 2.07 | 0.0094 | 0.001 | 0.00129 | -0.81 | 0.22 | vdW         |
|                                                         | 11 | Cl142...O118 | 3.80 | 0.0035 | 0.012 | 0.00060 | -0.74 | 0.86 | vdW         |
|                                                         | 12 | Cl142...O98  | 3.38 | 0.0063 | 0.022 | 0.00088 | -0.81 | 0.51 | vdW         |
|                                                         | 13 | H134...O97   | 2.28 | 0.0140 | 0.048 | 0.00137 | -0.87 | 0.22 | Weak H-bond |
|                                                         | 14 | H134...O98   | 2.88 | 0.0051 | 0.018 | 0.00073 | -0.80 | 0.18 | vdW         |

|                                                          |    |              |      |        |       |         |       |      |             |
|----------------------------------------------------------|----|--------------|------|--------|-------|---------|-------|------|-------------|
|                                                          | 15 | H136...H93   | 2.48 | 0.0046 | 0.014 | 0.00057 | -0.80 | 0.69 | vdW         |
|                                                          | 16 | H136...O98   | 2.50 | 0.0093 | 0.030 | 0.00090 | -0.86 | 0.04 | vdW         |
|                                                          | 17 | Cl144...H9   | 2.87 | 0.0079 | 0.026 | 0.00111 | -0.80 | 0.29 | vdW         |
|                                                          | 18 | Cl144...O13  | 3.16 | 0.0092 | 0.034 | 0.00117 | -0.84 | 0.46 | vdW         |
|                                                          | 19 | Cl144...H114 | 2.65 | 0.0112 | 0.037 | 0.00146 | -0.81 | 0.06 | Weak H-bond |
|                                                          | 20 | Cl144...O119 | 3.48 | 0.0059 | 0.020 | 0.00082 | -0.80 | 0.31 | vdW         |
|                                                          | 21 | Cl143...H30  | 2.90 | 0.0069 | 0.022 | 0.00100 | -0.77 | 0.12 | vdW         |
|                                                          | 22 | Cl143...O15  | 3.76 | 0.0034 | 0.011 | 0.00057 | -0.75 | 0.87 | vdW         |
|                                                          | 23 | Cl143...H9   | 2.91 | 0.0066 | 0.021 | 0.00102 | -0.75 | 0.09 | vdW         |
|                                                          | 24 | Cl143...O120 | 3.74 | 0.0035 | 0.012 | 0.00057 | -0.75 | 0.46 | vdW         |
|                                                          | 25 | Cl143...H114 | 3.12 | 0.0048 | 0.015 | 0.00070 | -0.76 | 0.25 | vdW         |
|                                                          | 26 | Cl143...H112 | 3.44 | 0.0023 | 0.007 | 0.00042 | -0.70 | 0.29 | vdW         |
|                                                          | 27 | Cl143...O99  | 3.85 | 0.0030 | 0.010 | 0.00049 | -0.74 | 0.30 | vdW         |
|                                                          | 28 | Cl143...H93  | 3.13 | 0.0046 | 0.014 | 0.00074 | -0.73 | 0.65 | vdW         |
| <b><math>\beta</math>-HCH@C1-<math>\beta</math>-CD.1</b> | 1  | Cl165...H41  | 2.66 | 0.0092 | 0.031 | 0.00137 | -0.78 | 0.06 | vdW         |
|                                                          | 2  | Cl165...O36  | 3.29 | 0.0076 | 0.025 | 0.00084 | -0.85 | 0.14 | vdW         |
|                                                          | 3  | Cl165...H49  | 2.83 | 0.0062 | 0.022 | 0.00111 | -0.74 | 0.05 | vdW         |
|                                                          | 4  | Cl165...H51  | 2.92 | 0.0069 | 0.021 | 0.00095 | -0.78 | 0.10 | vdW         |
|                                                          | 5  | Cl165...O57  | 3.41 | 0.0061 | 0.021 | 0.00078 | -0.82 | 0.11 | vdW         |
|                                                          | 6  | Cl165...H70  | 3.20 | 0.0038 | 0.012 | 0.00062 | -0.73 | 0.15 | vdW         |
|                                                          | 7  | Cl165...H72  | 3.16 | 0.0044 | 0.013 | 0.00064 | -0.76 | 0.33 | vdW         |
|                                                          | 8  | Cl164...H41  | 2.88 | 0.0067 | 0.024 | 0.00104 | -0.79 | 0.06 | vdW         |
|                                                          | 9  | Cl164...H51  | 2.98 | 0.0060 | 0.019 | 0.00091 | -0.76 | 0.06 | vdW         |
|                                                          | 10 | Cl164...O76  | 3.43 | 0.0055 | 0.021 | 0.00096 | -0.78 | 2.73 | vdW         |
|                                                          | 11 | Cl164...H72  | 2.87 | 0.0077 | 0.024 | 0.00107 | -0.79 | 0.01 | vdW         |
|                                                          | 12 | Cl164...O97  | 3.58 | 0.0047 | 0.016 | 0.00072 | -0.79 | 0.60 | vdW         |
|                                                          | 13 | H158...O35   | 2.63 | 0.0077 | 0.027 | 0.00084 | -0.86 | 0.55 | vdW         |
|                                                          | 14 | H158...O34   | 2.92 | 0.0038 | 0.013 | 0.00066 | -0.75 | 0.21 | vdW         |
|                                                          | 15 | H156...O34   | 2.93 | 0.0037 | 0.013 | 0.00065 | -0.75 | 0.02 | vdW         |
|                                                          | 16 | H156...H9    | 2.84 | 0.0016 | 0.006 | 0.00039 | -0.65 | 0.20 | vdW         |

|                                                          |    |              |      |        |       |         |       |      |                          |
|----------------------------------------------------------|----|--------------|------|--------|-------|---------|-------|------|--------------------------|
|                                                          | 17 | H157...O97   | 2.30 | 0.0135 | 0.049 | 0.00139 | -0.87 | 0.21 | Weak H-bond              |
|                                                          | 18 | H157...H93   | 1.99 | 0.0113 | 0.042 | 0.00162 | -0.82 | 0.94 | Weak H-bond <sup>b</sup> |
|                                                          | 19 | H159...O97   | 2.36 | 0.0113 | 0.040 | 0.00130 | -0.85 | 0.17 | Weak H-bond              |
|                                                          | 20 | H155...H93   | 2.51 | 0.0043 | 0.013 | 0.00055 | -0.80 | 0.46 | vdW                      |
|                                                          | 21 | H155...O98   | 2.66 | 0.0070 | 0.022 | 0.00078 | -0.84 | 0.08 | vdW                      |
|                                                          | 22 | H155...O116  | 2.94 | 0.0047 | 0.017 | 0.00071 | -0.80 | 1.11 | vdW                      |
|                                                          | 23 | Cl160...O116 | 3.78 | 0.0035 | 0.012 | 0.00060 | -0.74 | 0.46 | vdW                      |
|                                                          | 24 | Cl160...O98  | 3.56 | 0.0046 | 0.016 | 0.00073 | -0.78 | 0.54 | vdW                      |
|                                                          | 25 | Cl163...O99  | 3.93 | 0.0026 | 0.008 | 0.00045 | -0.73 | 0.54 | vdW                      |
|                                                          | 26 | Cl163...H112 | 3.14 | 0.0046 | 0.014 | 0.00067 | -0.76 | 0.45 | vdW                      |
|                                                          | 27 | Cl163...H110 | 3.50 | 0.0021 | 0.006 | 0.00038 | -0.69 | 0.97 | vdW                      |
|                                                          | 28 | Cl163...H131 | 3.17 | 0.0033 | 0.011 | 0.00065 | -0.69 | 0.11 | vdW                      |
|                                                          | 29 | Cl162...O13  | 3.73 | 0.0032 | 0.011 | 0.00061 | -0.72 | 0.19 | vdW                      |
|                                                          | 30 | Cl162...H133 | 3.18 | 0.0036 | 0.011 | 0.00064 | -0.71 | 0.20 | vdW                      |
|                                                          | 31 | Cl162...O117 | 3.52 | 0.0054 | 0.019 | 0.00081 | -0.79 | 0.26 | vdW                      |
|                                                          | 32 | Cl162...H112 | 2.67 | 0.0109 | 0.036 | 0.00143 | -0.81 | 0.07 | Weak H-bond              |
| <b><math>\beta</math>-HCH@C1-<math>\beta</math>-CD.2</b> | 1  | Cl165...H41  | 2.56 | 0.0112 | 0.037 | 0.00144 | -0.82 | 0.05 | Weak H-bond              |
|                                                          | 2  | Cl165...O36  | 3.16 | 0.0096 | 0.032 | 0.00094 | -0.87 | 0.19 | vdW                      |
|                                                          | 3  | Cl165...H49  | 2.68 | 0.0084 | 0.030 | 0.00144 | -0.77 | 0.03 | vdW                      |
|                                                          | 4  | Cl165...H51  | 2.76 | 0.0089 | 0.029 | 0.00124 | -0.79 | 0.14 | vdW                      |
|                                                          | 5  | Cl165...O57  | 3.14 | 0.0096 | 0.157 | 0.00103 | -0.86 | 0.16 | vdW                      |
|                                                          | 6  | Cl165...H70  | 3.05 | 0.0053 | 0.016 | 0.00080 | -0.76 | 0.16 | vdW                      |
|                                                          | 7  | Cl165...H72  | 2.80 | 0.0085 | 0.027 | 0.00117 | -0.79 | 0.08 | vdW                      |
|                                                          | 8  | Cl164...H41  | 2.98 | 0.0057 | 0.021 | 0.00091 | -0.79 | 0.51 | vdW                      |
|                                                          | 9  | Cl164...H72  | 2.81 | 0.0085 | 0.027 | 0.00114 | -0.80 | 0.05 | vdW                      |
|                                                          | 10 | Cl164...O97  | 3.53 | 0.0052 | 0.018 | 0.00076 | -0.79 | 0.38 | vdW                      |
|                                                          | 11 | H157...H93   | 1.91 | 0.0135 | 0.047 | 0.00169 | -0.83 | 0.22 | Weak H-bond <sup>b</sup> |
|                                                          | 12 | H159...O97   | 2.34 | 0.0123 | 0.042 | 0.00125 | -0.87 | 0.10 | Weak H-bond              |
|                                                          | 13 | H158...O35   | 2.66 | 0.0075 | 0.025 | 0.00079 | -0.86 | 0.49 | vdW                      |

|                                                           |    |              |      |        |       |         |       |      |             |
|-----------------------------------------------------------|----|--------------|------|--------|-------|---------|-------|------|-------------|
|                                                           | 14 | H158...O34   | 2.43 | 0.0096 | 0.033 | 0.00113 | -0.84 | 0.09 | vdW         |
|                                                           | 15 | H156...H30   | 2.34 | 0.0054 | 0.018 | 0.00073 | -0.80 | 0.48 | vdW         |
|                                                           | 16 | H156...O34   | 2.88 | 0.0045 | 0.016 | 0.00068 | -0.80 | 0.80 | vdW         |
|                                                           | 17 | H154...O34   | 3.04 | 0.0033 | 0.011 | 0.00055 | -0.75 | 0.84 | vdW         |
|                                                           | 18 | Cl163...O99  | 3.89 | 0.0028 | 0.009 | 0.00047 | -0.73 | 0.28 | vdW         |
|                                                           | 19 | Cl163...H110 | 3.22 | 0.0036 | 0.011 | 0.00062 | -0.71 | 0.10 | vdW         |
|                                                           | 20 | H155...H93   | 2.24 | 0.0068 | 0.021 | 0.00083 | -0.81 | 0.19 | vdW         |
|                                                           | 21 | H155...O98   | 2.71 | 0.0063 | 0.020 | 0.00071 | -0.83 | 0.05 | vdW         |
|                                                           | 22 | H155...O99   | 2.86 | 0.0046 | 0.015 | 0.00065 | -0.79 | 0.03 | vdW         |
|                                                           | 23 | Cl160...O98  | 3.57 | 0.0044 | 0.015 | 0.00069 | -0.78 | 0.18 | vdW         |
|                                                           | 24 | Cl162...H9   | 2.94 | 0.0065 | 0.020 | 0.00097 | -0.76 | 0.01 | vdW         |
|                                                           | 25 | Cl162...O139 | 3.40 | 0.0055 | 0.020 | 0.00082 | -0.80 | 0.04 | vdW         |
|                                                           | 26 | Cl162...H133 | 2.52 | 0.0115 | 0.041 | 0.00172 | -0.80 | 0.05 | Weak H-bond |
|                                                           | 27 | Cl162...H131 | 3.05 | 0.0049 | 0.016 | 0.00078 | -0.75 | 0.07 | vdW         |
|                                                           | 28 | Cl162...O118 | 3.32 | 0.0070 | 0.024 | 0.00086 | -0.83 | 0.09 | vdW         |
|                                                           | 29 | Cl162...H112 | 2.88 | 0.0068 | 0.022 | 0.00110 | -0.75 | 0.03 | vdW         |
| <b><math>\beta</math>-HCH@C1-<math>\gamma</math>-CD.1</b> | 1  | Cl183...H51  | 2.87 | 0.0079 | 0.025 | 0.00100 | -0.81 | 0.13 | vdW         |
|                                                           | 2  | Cl183...H62  | 2.68 | 0.0083 | 0.029 | 0.00148 | -0.75 | 0.14 | vdW         |
|                                                           | 3  | Cl183...O97  | 3.46 | 0.0048 | 0.018 | 0.00083 | -0.77 | 0.18 | vdW         |
|                                                           | 4  | Cl183...H93  | 3.04 | 0.0055 | 0.017 | 0.00079 | -0.77 | 0.03 | vdW         |
|                                                           | 5  | Cl183...O118 | 3.35 | 0.0069 | 0.023 | 0.00084 | -0.83 | 0.02 | vdW         |
|                                                           | 6  | Cl184...H70  | 2.85 | 0.0059 | 0.020 | 0.00111 | -0.72 | 0.07 | vdW         |
|                                                           | 7  | Cl184...H51  | 3.09 | 0.0049 | 0.015 | 0.00075 | -0.74 | 0.12 | vdW         |
|                                                           | 8  | Cl184...O57  | 3.82 | 0.0029 | 0.010 | 0.00053 | -0.72 | 1.39 | vdW         |
|                                                           | 9  | H176...H51   | 2.37 | 0.0059 | 0.020 | 0.00077 | -0.82 | 1.87 | vdW         |
|                                                           | 10 | H176...O55   | 2.94 | 0.0047 | 0.018 | 0.00072 | -0.80 | 1.18 | vdW         |
|                                                           | 11 | H176...O35   | 2.62 | 0.0076 | 0.024 | 0.00076 | -0.85 | 0.06 | vdW         |
|                                                           | 12 | Cl181...O35  | 3.31 | 0.0072 | 0.026 | 0.00103 | -0.82 | 0.59 | vdW         |
|                                                           | 13 | H177...O118  | 2.34 | 0.0126 | 0.044 | 0.00124 | -0.87 | 0.11 | Weak H-bond |
|                                                           | 14 | H175...O118  | 2.34 | 0.0122 | 0.043 | 0.00141 | -0.85 | 0.17 | Weak H-bond |

|                                                           |    |              |      |        |       |         |       |      |             |
|-----------------------------------------------------------|----|--------------|------|--------|-------|---------|-------|------|-------------|
|                                                           | 15 | H178...H30   | 2.32 | 0.0047 | 0.016 | 0.00080 | -0.74 | 0.01 | vdW         |
|                                                           | 16 | H180...O35   | 2.86 | 0.0054 | 0.018 | 0.00071 | -0.81 | 0.15 | vdW         |
|                                                           | 17 | H180...O34   | 2.34 | 0.0114 | 0.040 | 0.00131 | -0.85 | 0.14 | Weak H-bond |
|                                                           | 18 | H175...O119  | 2.96 | 0.0046 | 0.016 | 0.00070 | -0.79 | 0.31 | vdW         |
|                                                           | 19 | Cl186...H114 | 3.22 | 0.0038 | 0.012 | 0.00062 | -0.72 | 0.45 | vdW         |
|                                                           | 20 | Cl186...H133 | 3.81 | 0.0011 | 0.003 | 0.00023 | -0.64 | 0.12 | vdW         |
|                                                           | 21 | Cl186...H154 | 3.47 | 0.0020 | 0.007 | 0.00042 | -0.66 | 0.07 | vdW         |
|                                                           | 22 | H179...O119  | 2.41 | 0.0109 | 0.036 | 0.00106 | -0.87 | 0.02 | Weak H-bond |
|                                                           | 23 | H179...H114  | 2.40 | 0.0052 | 0.016 | 0.00070 | -0.79 | 0.68 | vdW         |
|                                                           | 24 | Cl182...O119 | 3.40 | 0.0060 | 0.022 | 0.00087 | -0.81 | 0.48 | vdW         |
|                                                           | 25 | Cl185...O34  | 3.54 | 0.0051 | 0.016 | 0.00068 | -0.80 | 0.28 | vdW         |
|                                                           | 26 | Cl185...H9   | 3.01 | 0.0053 | 0.017 | 0.00085 | -0.75 | 0.07 | vdW         |
|                                                           | 27 | Cl185...H154 | 3.76 | 0.0015 | 0.004 | 0.00027 | -0.68 | 0.97 | vdW         |
|                                                           | 28 | Cl185...H135 | 2.71 | 0.0096 | 0.031 | 0.00139 | -0.78 | 0.05 | vdW         |
|                                                           | 29 | Cl185...H156 | 3.26 | 0.0027 | 0.009 | 0.00053 | -0.68 | 0.20 | vdW         |
| <b><math>\beta</math>-HCH@C1-<math>\gamma</math>-CD.2</b> | 1  | Cl183...H93  | 3.00 | 0.0055 | 0.017 | 0.00090 | -0.74 | 0.11 | vdW         |
|                                                           | 2  | Cl183...O99  | 3.36 | 0.0062 | 0.021 | 0.00082 | -0.82 | 0.14 | vdW         |
|                                                           | 3  | Cl183...H91  | 3.08 | 0.0048 | 0.015 | 0.00077 | -0.73 | 0.06 | vdW         |
|                                                           | 4  | Cl183...H114 | 3.04 | 0.0040 | 0.014 | 0.00079 | -0.71 | 0.09 | vdW         |
|                                                           | 5  | Cl183...H112 | 2.87 | 0.0066 | 0.022 | 0.00110 | -0.74 | 0.09 | vdW         |
|                                                           | 6  | H176...O78   | 3.13 | 0.0026 | 0.010 | 0.00054 | -0.71 | 0.94 | vdW         |
|                                                           | 7  | H176...H70   | 2.45 | 0.0042 | 0.013 | 0.00059 | -0.77 | 0.22 | vdW         |
|                                                           | 8  | Cl181...O78  | 3.80 | 0.0033 | 0.011 | 0.00053 | -0.75 | 0.88 | vdW         |
|                                                           | 9  | Cl181...H93  | 3.22 | 0.0039 | 0.012 | 0.00060 | -0.75 | 0.22 | vdW         |
|                                                           | 10 | Cl181...H72  | 3.29 | 0.0031 | 0.010 | 0.00053 | -0.72 | 0.17 | vdW         |
|                                                           | 11 | Cl181...H70  | 2.95 | 0.0062 | 0.019 | 0.00093 | -0.76 | 0.04 | vdW         |
|                                                           | 12 | H178...O80   | 2.31 | 0.0125 | 0.044 | 0.00135 | -0.86 | 0.09 | Weak H-bond |
|                                                           | 13 | H180...H70   | 2.30 | 0.0061 | 0.020 | 0.00085 | -0.79 | 0.40 | vdW         |
|                                                           | 14 | H180...H79   | 2.35 | 0.0057 | 0.020 | 0.00099 | -0.76 | 0.38 | vdW         |
|                                                           | 15 | Cl184...H165 | 3.12 | 0.0049 | 0.015 | 0.00078 | -0.75 | 0.39 | vdW         |



|                                                         |    |              |      |        |       |         |       |       |             |
|---------------------------------------------------------|----|--------------|------|--------|-------|---------|-------|-------|-------------|
|                                                         | 16 | Cl184...H133 | 3.35 | 0.0032 | 0.009 | 0.00048 | -0.75 | 0.03  | vdW         |
|                                                         | 17 | Cl184...H142 | 3.39 | 0.0032 | 0.011 | 0.00066 | -0.69 | 1.60  | vdW         |
|                                                         | 18 | H177...H154  | 2.32 | 0.0048 | 0.016 | 0.00079 | -0.75 | 0.14  | vdW         |
|                                                         | 19 | Cl186...H154 | 3.13 | 0.0056 | 0.017 | 0.00079 | -0.78 | 0.52  | vdW         |
|                                                         | 20 | Cl186...H163 | 2.78 | 0.0086 | 0.028 | 0.00128 | -0.78 | 0.14  | vdW         |
|                                                         | 21 | Cl186...O162 | 3.93 | 0.0027 | 0.009 | 0.00047 | -0.72 | 0.59  | vdW         |
|                                                         | 22 | Cl186...H18  | 3.34 | 0.0028 | 0.009 | 0.00050 | -0.69 | 0.12  | vdW         |
|                                                         | 23 | H179...O162  | 3.24 | 0.0019 | 0.007 | 0.00047 | -0.66 | 1.29  | vdW         |
|                                                         | 24 | Cl182...O15  | 3.76 | 0.0032 | 0.011 | 0.00057 | -0.74 | 0.22  | vdW         |
|                                                         | 25 | Cl182...H30  | 2.79 | 0.0067 | 0.023 | 0.00117 | -0.75 | 0.05  | vdW         |
|                                                         | 26 | Cl182...H28  | 2.88 | 0.0071 | 0.023 | 0.00105 | -0.77 | 0.07  | vdW         |
|                                                         | 27 | Cl182...O36  | 3.23 | 0.0081 | 0.028 | 0.00094 | -0.85 | 0.10  | vdW         |
|                                                         | 28 | Cl182...H49  | 2.92 | 0.0067 | 0.021 | 0.00098 | -0.77 | 0.05  | vdW         |
|                                                         | 29 | Cl182...H51  | 2.99 | 0.0059 | 0.018 | 0.00090 | -0.76 | 0.14  | vdW         |
|                                                         | 30 | Cl185...H7   | 2.98 | 0.0056 | 0.018 | 0.00093 | -0.74 | 0.06  | vdW         |
|                                                         | 31 | Cl185...H39  | 3.23 | 0.0044 | 0.016 | 0.00083 | -0.73 | 4.46  | vdW         |
|                                                         | 32 | Cl185...H28  | 2.82 | 0.0083 | 0.026 | 0.00120 | -0.78 | 0.12  | vdW         |
|                                                         | 33 | Cl185...H60  | 3.23 | 0.0038 | 0.012 | 0.00065 | -0.73 | 0.48  | vdW         |
|                                                         | 34 | Cl185...H49  | 3.36 | 0.0034 | 0.015 | 0.00047 | -0.76 | 0.43  | vdW         |
| <b><math>\beta</math>-HCH@C4-<math>\alpha</math>-CD</b> | 1  | Cl143...H58  | 2.78 | 0.0080 | 0.030 | 0.00146 | -0.76 | 0.26  | vdW         |
|                                                         | 2  | Cl143...H49  | 2.85 | 0.0076 | 0.025 | 0.00115 | -0.78 | 0.14  | vdW         |
|                                                         | 3  | Cl143...H81  | 2.98 | 0.0071 | 0.025 | 0.00125 | -0.75 | 2.44  | vdW         |
|                                                         | 4  | Cl140...H79  | 3.07 | 0.0048 | 0.015 | 0.00082 | -0.72 | 0.12  | vdW         |
|                                                         | 5  | H137...O101  | 2.37 | 0.0114 | 0.041 | 0.00139 | -0.84 | 0.06  | Weak H-bond |
|                                                         | 6  | H133...O101  | 2.20 | 0.0158 | 0.061 | 0.00205 | -0.84 | 0.17  | Weak H-bond |
|                                                         | 7  | H135...O101  | 2.42 | 0.0109 | 0.037 | 0.00112 | -0.86 | 0.17  | Weak H-bond |
|                                                         | 8  | H136...H37   | 2.30 | 0.0044 | 0.014 | 0.00066 | -0.76 | -1.56 | vdW         |
|                                                         | 9  | Cl144...H28  | 2.85 | 0.0077 | 0.025 | 0.00115 | -0.77 | 0.15  | vdW         |
|                                                         | 10 | Cl144...H91  | 3.38 | 0.0028 | 0.008 | 0.00047 | -0.70 | 0.06  | vdW         |
|                                                         | 11 | Cl144...H39  | 3.16 | 0.0053 | 0.018 | 0.00092 | -0.75 | 0.44  | vdW         |

|                                                          |    |              |      |        |       |         |       |      |     |
|----------------------------------------------------------|----|--------------|------|--------|-------|---------|-------|------|-----|
|                                                          | 12 | Cl144...H7   | 3.05 | 0.0049 | 0.015 | 0.00083 | -0.72 | 0.10 | vdW |
|                                                          | 13 | Cl144...H112 | 3.09 | 0.0046 | 0.014 | 0.00078 | -0.72 | 0.08 | vdW |
|                                                          | 14 | Cl142...H7   | 3.12 | 0.0054 | 0.018 | 0.00084 | -0.77 | 1.99 | vdW |
|                                                          | 15 | Cl142...H18  | 2.80 | 0.0088 | 0.034 | 0.00162 | -0.77 | 1.44 | vdW |
|                                                          | 16 | Cl142...H121 | 2.73 | 0.0097 | 0.032 | 0.00136 | -0.80 | 0.05 | vdW |
|                                                          | 17 | Cl141...H121 | 3.16 | 0.0046 | 0.014 | 0.00069 | -0.75 | 0.34 | vdW |
| <b><math>\beta</math>-HCH@C4-<math>\beta</math>-CD.1</b> | 1  | Cl161...H79  | 3.90 | 0.0012 | 0.004 | 0.00025 | -0.66 | 2.88 | vdW |
|                                                          | 2  | Cl161...H101 | 3.21 | 0.0038 | 0.014 | 0.00080 | -0.70 | 1.20 | vdW |
|                                                          | 3  | Cl161...H121 | 3.18 | 0.0042 | 0.014 | 0.00074 | -0.72 | 0.42 | vdW |
|                                                          | 4  | Cl164...H119 | 3.21 | 0.0040 | 0.012 | 0.00063 | -0.74 | 0.06 | vdW |
|                                                          | 5  | Cl164...H110 | 3.33 | 0.0031 | 0.010 | 0.00054 | -0.72 | 0.36 | vdW |
|                                                          | 6  | Cl164...H142 | 3.28 | 0.0043 | 0.016 | 0.00084 | -0.72 | 0.89 | vdW |
|                                                          | 7  | Cl164...H131 | 2.84 | 0.0070 | 0.023 | 0.00110 | -0.76 | 0.08 | vdW |
|                                                          | 8  | Cl164...H18  | 3.13 | 0.0049 | 0.015 | 0.00071 | -0.77 | 0.13 | vdW |
|                                                          | 9  | Cl165...H140 | 2.87 | 0.0067 | 0.022 | 0.00111 | -0.75 | 0.08 | vdW |
|                                                          | 10 | Cl165...H16  | 2.95 | 0.0073 | 0.025 | 0.00117 | -0.77 | 0.87 | vdW |
|                                                          | 11 | H157...O38   | 2.48 | 0.0090 | 0.031 | 0.00105 | -0.84 | 0.04 | vdW |
|                                                          | 12 | H159...H58   | 2.31 | 0.0078 | 0.027 | 0.00109 | -0.80 | 1.51 | vdW |
|                                                          | 13 | H159...O38   | 2.47 | 0.0096 | 0.031 | 0.00093 | -0.87 | 0.17 | vdW |
|                                                          | 14 | H155...O38   | 2.43 | 0.0096 | 0.034 | 0.00109 | -0.85 | 0.11 | vdW |
|                                                          | 15 | Cl165...H16  | 2.95 | 0.0073 | 0.025 | 0.00117 | -0.77 | 0.87 | vdW |
|                                                          | 16 | Cl165...H140 | 2.87 | 0.0067 | 0.022 | 0.00111 | -0.75 | 0.08 | vdW |
|                                                          | 17 | Cl164...H18  | 3.13 | 0.0049 | 0.015 | 0.00071 | -0.77 | 0.13 | vdW |
|                                                          | 18 | Cl164...H131 | 2.84 | 0.0070 | 0.023 | 0.00110 | -0.76 | 0.08 | vdW |
|                                                          | 19 | Cl164...H142 | 3.28 | 0.0043 | 0.016 | 0.00084 | -0.72 | 0.89 | vdW |
|                                                          | 20 | Cl164...H110 | 3.33 | 0.0031 | 0.010 | 0.00054 | -0.72 | 0.36 | vdW |
|                                                          | 21 | Cl164...H119 | 3.21 | 0.0040 | 0.012 | 0.00063 | -0.74 | 0.06 | vdW |
| <b><math>\beta</math>-HCH@C4-<math>\beta</math>-CD.2</b> | 1  | H154...O13   | 3.04 | 0.0030 | 0.011 | 0.00058 | -0.73 | 1.20 | vdW |
|                                                          | 2  | Cl162...H133 | 2.87 | 0.0075 | 0.023 | 0.00110 | -0.77 | 0.01 | vdW |
|                                                          | 3  | Cl162...O118 | 3.38 | 0.0058 | 0.021 | 0.00083 | -0.81 | 0.03 | vdW |

|  |    |              |      |        |       |         |       |      |                          |
|--|----|--------------|------|--------|-------|---------|-------|------|--------------------------|
|  | 4  | Cl162...H112 | 2.59 | 0.0100 | 0.036 | 0.00162 | -0.78 | 0.08 | Weak H-bond              |
|  | 5  | Cl162...H110 | 2.89 | 0.0066 | 0.021 | 0.00103 | -0.76 | 0.08 | vdW                      |
|  | 6  | Cl162...O99  | 3.15 | 0.0095 | 0.033 | 0.00102 | -0.86 | 0.15 | vdW                      |
|  | 7  | Cl162...H93  | 2.70 | 0.0097 | 0.032 | 0.00138 | -0.79 | 0.02 | vdW                      |
|  | 8  | Cl162...H91  | 3.09 | 0.0050 | 0.015 | 0.00074 | -0.76 | 0.33 | vdW                      |
|  | 9  | Cl160...O77  | 3.76 | 0.0033 | 0.011 | 0.00055 | -0.74 | 0.19 | vdW                      |
|  | 10 | Cl163...H91  | 3.09 | 0.0049 | 0.015 | 0.00075 | -0.75 | 0.15 | vdW                      |
|  | 11 | Cl163...H72  | 3.52 | 0.0049 | 0.015 | 0.00070 | -0.78 | 0.33 | vdW                      |
|  | 12 | Cl163...O78  | 3.86 | 0.0031 | 0.010 | 0.00048 | -0.75 | 0.95 | vdW                      |
|  | 13 | H155...O78   | 2.53 | 0.0081 | 0.027 | 0.00091 | -0.84 | 0.09 | vdW                      |
|  | 14 | H155...H72   | 2.39 | 0.0049 | 0.015 | 0.00070 | -0.78 | 0.33 | vdW                      |
|  | 15 | H159...O77   | 2.92 | 0.0041 | 0.013 | 0.00062 | -0.77 | 0.07 | vdW                      |
|  | 16 | H159...H72   | 2.54 | 0.0042 | 0.014 | 0.00058 | -0.79 | 0.67 | vdW                      |
|  | 17 | H159...H82   | 2.24 | 0.0046 | 0.017 | 0.00086 | -0.75 | 0.08 | vdW                      |
|  | 18 | H157...H72   | 1.84 | 0.0141 | 0.047 | 0.00179 | -0.82 | 0.08 | Weak H-bond <sup>b</sup> |
|  | 19 | Cl164...O76  | 3.74 | 0.0037 | 0.012 | 0.00062 | -0.74 | 0.47 | vdW                      |
|  | 20 | Cl164...H51  | 2.98 | 0.0061 | 0.019 | 0.00088 | -0.77 | 0.20 | vdW                      |
|  | 21 | Cl164...O14  | 3.52 | 0.0051 | 0.019 | 0.00085 | -0.79 | 0.74 | vdW                      |
|  | 22 | Cl165...H51  | 2.69 | 0.0105 | 0.034 | 0.00140 | -0.80 | 0.07 | Weak H-bond              |
|  | 23 | Cl165...H49  | 2.98 | 0.0062 | 0.019 | 0.00089 | -0.77 | 0.15 | vdW                      |
|  | 24 | Cl165...O36  | 3.04 | 0.0110 | 0.040 | 0.00122 | -0.86 | 0.18 | vdW <sup>a</sup>         |
|  | 25 | Cl165...H30  | 2.91 | 0.0066 | 0.021 | 0.00098 | -0.77 | 0.20 | vdW                      |
|  | 26 | Cl165...H28  | 2.61 | 0.0099 | 0.035 | 0.00158 | -0.78 | 0.02 | vdW                      |
|  | 27 | Cl165...O15  | 3.11 | 0.0104 | 0.036 | 0.00101 | -0.87 | 0.23 | vdW <sup>a</sup>         |
|  | 28 | Cl165...H20  | 2.59 | 0.0106 | 0.036 | 0.00151 | -0.80 | 0.03 | Weak H-bond              |
|  | 29 | Cl165...H9   | 2.76 | 0.0092 | 0.029 | 0.00124 | -0.79 | 0.12 | vdW                      |
|  | 30 | H158...O14   | 2.69 | 0.0069 | 0.023 | 0.00073 | -0.85 | 0.32 | vdW                      |
|  | 31 | H158...O13   | 2.41 | 0.0106 | 0.036 | 0.00106 | -0.87 | 0.08 | Weak H-bond              |
|  | 32 | H156...H9    | 2.33 | 0.0052 | 0.016 | 0.00073 | -0.78 | 0.42 | vdW                      |

|                                                         |    |              |      |        |       |          |       |       |     |
|---------------------------------------------------------|----|--------------|------|--------|-------|----------|-------|-------|-----|
| <b><math>\beta</math>-HCH@C4-<math>\gamma</math>-CD</b> | 1  | Cl186...H125 | 2.80 | 0.0074 | 0.027 | 0.00121  | -0.78 | 0.23  | vdW |
|                                                         | 2  | H177...O120  | 2.83 | 0.0042 | 0.015 | 0.00073  | -0.75 | 0.12  | vdW |
|                                                         | 3  | H177...H133  | 2.42 | 0.0046 | 0.015 | 0.00064  | -0.79 | 0.19  | vdW |
|                                                         | 4  | H175...H114  | 2.54 | 0.0030 | 0.010 | 0.00059  | -0.69 | 0.10  | vdW |
|                                                         | 5  | H179...O119  | 2.68 | 0.0067 | 0.022 | -0.00394 | -0.83 | 0.27  | vdW |
|                                                         | 6  | H179...H114  | 2.40 | 0.0050 | 0.016 | 0.00076  | -0.77 | 0.18  | vdW |
|                                                         | 7  | H179...H124  | 2.36 | 0.0041 | 0.016 | 0.00077  | -0.76 | 0.48  | vdW |
|                                                         | 8  | Cl182...O118 | 3.59 | 0.0046 | 0.016 | 0.00072  | -0.77 | 0.28  | vdW |
|                                                         | 9  | Cl182...H93  | 2.96 | 0.0051 | 0.017 | 0.00094  | -0.71 | 0.11  | vdW |
|                                                         | 10 | Cl182...O78  | 3.79 | 0.0028 | 0.010 | 0.00056  | -0.71 | 20.97 | vdW |
|                                                         | 11 | Cl182...H70  | 2.98 | 0.0056 | 0.018 | 0.00090  | -0.74 | 0.07  | vdW |
|                                                         | 12 | Cl182...O57  | 3.52 | 0.0050 | 0.017 | 0.00071  | -0.80 | 0.16  | vdW |
|                                                         | 13 | Cl182...H51  | 2.81 | 0.0077 | 0.025 | 0.00121  | -0.76 | 0.03  | vdW |
|                                                         | 14 | Cl185...H51  | 3.21 | 0.0045 | 0.014 | 0.00064  | -0.78 | 0.89  | vdW |
|                                                         | 15 | Cl185...O55  | 3.46 | 0.0057 | 0.020 | 0.00083  | -0.79 | 0.27  | vdW |
|                                                         | 16 | Cl185...H41  | 2.95 | 0.0059 | 0.020 | 0.00086  | -0.79 | 0.58  | vdW |
|                                                         | 17 | Cl181...H70  | 3.24 | 0.0036 | 0.011 | 0.00060  | -0.73 | 0.33  | vdW |
|                                                         | 18 | Cl181...H49  | 3.61 | 0.0018 | 0.005 | 0.00032  | -0.67 | 0.02  | vdW |
|                                                         | 19 | Cl181...H28  | 4.20 | 0.0006 | 0.002 | 0.00014  | -0.57 | 0.22  | vdW |
|                                                         | 20 | H180...O36   | 2.88 | 0.0039 | 0.013 | 0.00066  | -0.76 | 0.07  | vdW |
|                                                         | 21 | H180...H30   | 2.57 | 0.0033 | 0.010 | 0.00056  | -0.72 | 0.54  | vdW |
|                                                         | 22 | H178...H30   | 2.05 | 0.0093 | 0.032 | 0.00137  | -0.80 | 0.30  | vdW |
|                                                         | 23 | H178...O34   | 2.54 | 0.0081 | 0.030 | 0.00109  | -0.83 | 0.80  | vdW |
|                                                         | 24 | H176...O15   | 3.14 | 0.0022 | 0.008 | 0.00052  | -0.67 | 0.17  | vdW |
|                                                         | 25 | Cl184...H9   | 2.79 | 0.0080 | 0.026 | 0.00125  | -0.77 | 0.10  | vdW |
|                                                         | 26 | Cl184...H7   | 3.00 | 0.0060 | 0.018 | 0.00085  | -0.77 | 0.05  | vdW |
|                                                         | 27 | Cl184...O162 | 3.20 | 0.0079 | 0.028 | 0.00097  | -0.84 | 0.08  | vdW |
|                                                         | 28 | Cl184...H156 | 2.88 | 0.0060 | 0.020 | 0.00103  | -0.74 | 0.09  | vdW |
|                                                         | 29 | Cl184...H154 | 2.78 | 0.0083 | 0.027 | 0.00126  | -0.77 | 0.04  | vdW |
|                                                         | 30 | Cl184...O141 | 3.63 | 0.0042 | 0.014 | 0.00064  | -0.78 | 0.12  | vdW |

|  |    |              |      |        |       |         |       |      |     |
|--|----|--------------|------|--------|-------|---------|-------|------|-----|
|  | 31 | Cl183...H7   | 3.30 | 0.0033 | 0.010 | 0.00055 | -0.73 | 0.67 | vdW |
|  | 32 | Cl183...H18  | 3.56 | 0.0022 | 0.007 | 0.00041 | -0.70 | 0.71 | vdW |
|  | 33 | Cl183...H154 | 3.06 | 0.0052 | 0.016 | 0.00078 | -0.75 | 0.25 | vdW |
|  | 34 | Cl183...H133 | 3.02 | 0.0059 | 0.018 | 0.00082 | -0.77 | 0.15 | vdW |
|  | 35 | Cl183...H142 | 3.27 | 0.0042 | 0.015 | 0.00085 | -0.71 | 0.73 | vdW |

a Halogen bond, interaction with the electron density of a H-bond between a halogen atom and a more electronegative atom (chlorine and oxygen in this particular case) that is due to the anisotropy of the electronic density of the halogen.

b Dihydrogen bond, H-bond that is established between two H atoms with a high difference on their partial charges.

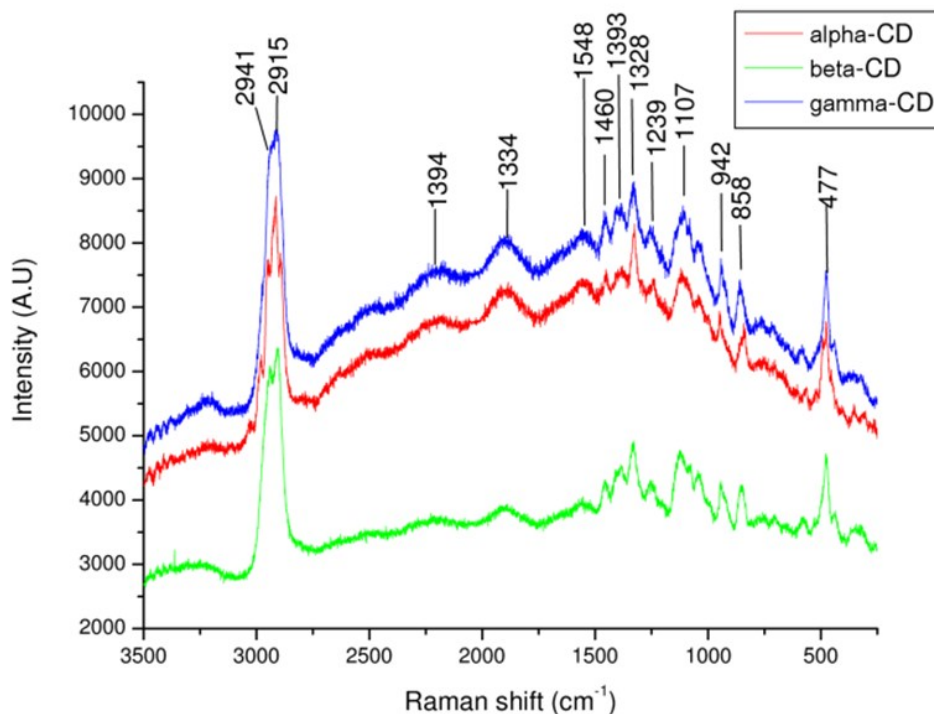

**Figure S3.** Resonance Raman spectra of the different cyclodextrins  $\alpha$ -CD in black,  $\beta$ -CD in red, and  $\gamma$ -CD in green.

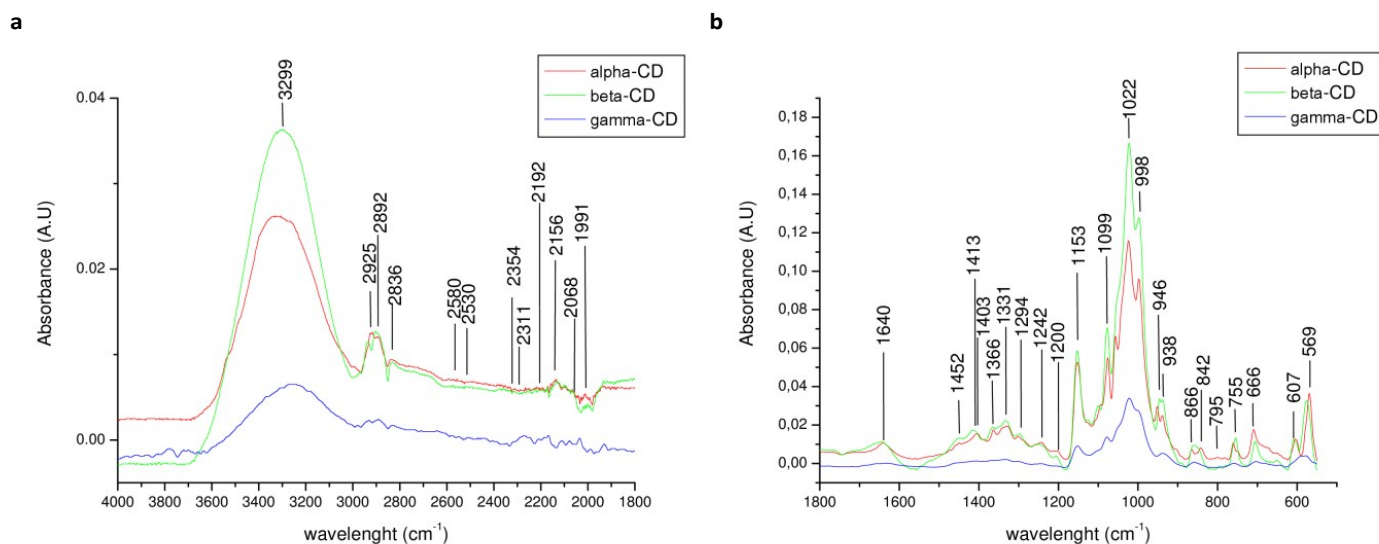

**Figure S4.** ATR-FTIR spectra of the region of the absorption peak of the CDs. (a) At the left in the region of 4000-1800  $\text{cm}^{-1}$  and (b) at the right in the region 1800-500 $\text{cm}^{-1}$  ( $\alpha$  in red,  $\beta$  in green, and  $\gamma$  in blue)

**Table S8.** Assignments of the absorption bands (cm<sup>-1</sup>) in Raman

| $\beta$ -HCH<br>(cm <sup>-1</sup> ) | $\alpha$ -CD<br>(cm <sup>-1</sup> ) | $\beta$ -CD<br>(cm <sup>-1</sup> ) | $\gamma$ -CD<br>(cm <sup>-1</sup> ) | $\beta$ -HCH@ $\alpha$ -CD<br>(cm <sup>-1</sup> ) | $\beta$ -HCH@ $\beta$ -CD<br>(cm <sup>-1</sup> ) | $\beta$ -HCH@ $\gamma$ -CD<br>(cm <sup>-1</sup> ) | assignments                                       |
|-------------------------------------|-------------------------------------|------------------------------------|-------------------------------------|---------------------------------------------------|--------------------------------------------------|---------------------------------------------------|---------------------------------------------------|
| 2938                                | 2941;<br>2915                       | 2941;<br>2915                      | 2941;<br>2915                       | 2938                                              | 2938                                             | 2938                                              | $\nu_{\text{as}}$ (C-H)<br>of -CH <sub>2</sub>    |
| 1330, 1285,<br>1206 and<br>1004     | -                                   | -                                  | -                                   | 1330, 1285,<br>1206 and 1004                      | 1330, 1285,<br>1206 and 1004                     | 1330, 1285,<br>1206 and 1004                      | $\nu$ (C-H)<br>stretching                         |
| -                                   | -                                   | -                                  | -                                   | 1228;<br>1190                                     | 1228;<br>1190                                    | 1228;<br>1190                                     | $\nu$ (C-O-C)<br>stretch                          |
| -                                   | 942                                 | 942                                | 942                                 | -                                                 | -                                                | 939                                               | $\nu_{\text{as}}$ (C-O-C)<br>stretch <sup>2</sup> |
| 848                                 | 858                                 | 858                                | 858                                 | 848                                               | 848                                              | 848                                               | $\delta$ (C-H) out of<br>plane bending            |
| 741                                 | -                                   | -                                  | -                                   | 741                                               | 741                                              | 741                                               | $\delta$ (C-Cl)                                   |
| 298; 259                            | -                                   | -                                  | -                                   | 298; 259                                          | 298; 259                                         | 298; 259                                          | $\delta$ (C-C)                                    |

**Table S10.** Assignments of the absorption bands (cm<sup>-1</sup>) in ATR-FTIR

| $\beta$ -HCH<br>(cm <sup>-1</sup> ) | $\alpha$ -CD<br>(cm <sup>-1</sup> ) | $\beta$ -CD<br>(cm <sup>-1</sup> ) | $\gamma$ -CD<br>(cm <sup>-1</sup> ) | $\beta$ -HCH@ $\alpha$ -CD<br>(cm <sup>-1</sup> ) | $\beta$ -HCH@ $\beta$ -CD<br>(cm <sup>-1</sup> ) | $\beta$ -HCH@ $\gamma$ -CD<br>(cm <sup>-1</sup> ) | assignments                                       |
|-------------------------------------|-------------------------------------|------------------------------------|-------------------------------------|---------------------------------------------------|--------------------------------------------------|---------------------------------------------------|---------------------------------------------------|
| -                                   | ~3300                               | ~3326                              | ~3259                               | -                                                 | -                                                | -                                                 | $\nu$ (O...H)<br>stretch                          |
| 2988; 2975;<br>2964; 2933           | 2925                                | 2925                               | 2925                                | 2963;<br>2941                                     | 2963;<br>2941                                    | 2963;<br>2941                                     | $\nu_{\text{as}}$ (C-H) of<br>-CH <sub>2</sub>    |
| -                                   | -                                   | -                                  | -                                   | 2644-2397                                         | 2644-2397                                        | 2644-2397                                         | new bands                                         |
|                                     | 1639                                | 1643 <sup>3</sup>                  | -                                   | -                                                 | -                                                | -                                                 | $\nu$ (O-H) bending                               |
| 1341                                | -                                   | -                                  | -                                   | -                                                 | -                                                | -                                                 | $\nu$ (C-H)<br>bending, rocking                   |
| -                                   | -                                   | -                                  | -                                   | 1228;<br>1190                                     | 1228;<br>1190                                    | 1228;<br>1190                                     | $\nu$ (C-O-C)<br>stretch                          |
| -                                   | 1153;<br>1078                       | 1153;<br>1078                      | 1153;<br>1078                       | -                                                 | -                                                | -                                                 | $\nu_{\text{as}}$ (C-O-C)<br>stretch <sup>4</sup> |
| 778-666                             | -                                   | -                                  | -                                   | -                                                 | -                                                | -                                                 | $\nu$ (C-Cl)                                      |



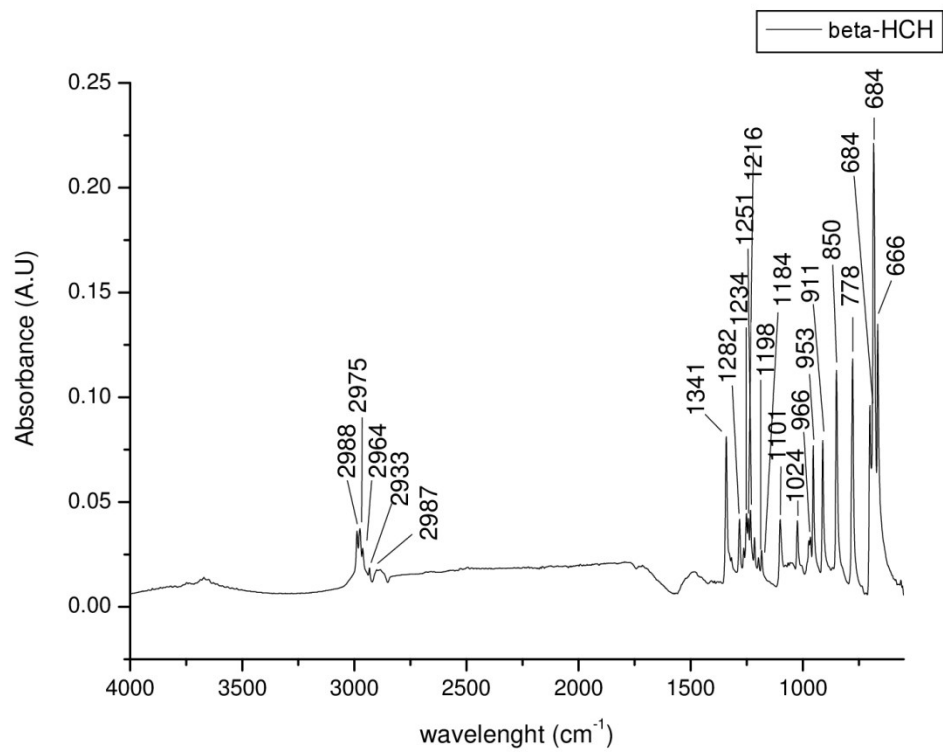

**Figure S5.** ATR-FTIR spectrum of  $\beta$ -HCH in 4000-550  $\text{cm}^{-1}$  region.

## References

1. Mura, P., Analytical Techniques for Characterization of Cyclodextrin Complexes in Aqueous Solution: A Review. *J. Pharm. Biomed. Anal.* **2014**, *101*, 238-250.
2. Prosser, A. J. and Franses, E. I., Infrared Reflection Absorption Spectroscopy (Irras) of Aqueous Nonsurfactant Salts, Ionic Surfactants, and Mixed Ionic Surfactants. *Langmuir*. **2002**, *18* (24), 9234-9242.
3. Ghorpade, M. V. S., Preparation and Evaluation of Domperidone/B-Cyclodextrin/Citric Acid/Mannitol Quaternary Inclusion Complex: An in Vitro Study. *Asian J. Pharm.* **2016**, *10* (03).
4. Cannavà, C.; Crupi, V.; Ficarra, P.; Guardo, M.; Majolino, D.; Mazzaglia, A.; Stancanelli, R. and Venuti, V., Physico-Chemical Characterization of an Amphiphilic Cyclodextrin/Genistein Complex. *J. Pharm. Biomed. Anal.* **2010**, *51* (5), 1064-1068.
